# Supplementary material for: Microbial-Host Co-metabolites Are Prodromal Markers Predicting Phenotypic Heterogeneity in Behavior, Obesity, and Impaired Glucose Tolerance
Source: PubMed Central journal article supplement (PMC5507771; doi:10.1016/j.celrep.2017.06.039), 2017-07-05
Supplement: mmc6.pdf [file mmc6.pdf]

## Microbial-Host Co-metabolites Are Prodromal Markers Predicting Phenotypic Heterogeneity in Behavior, Obesity, and Impaired Glucose Tolerance

### Graphical Abstract

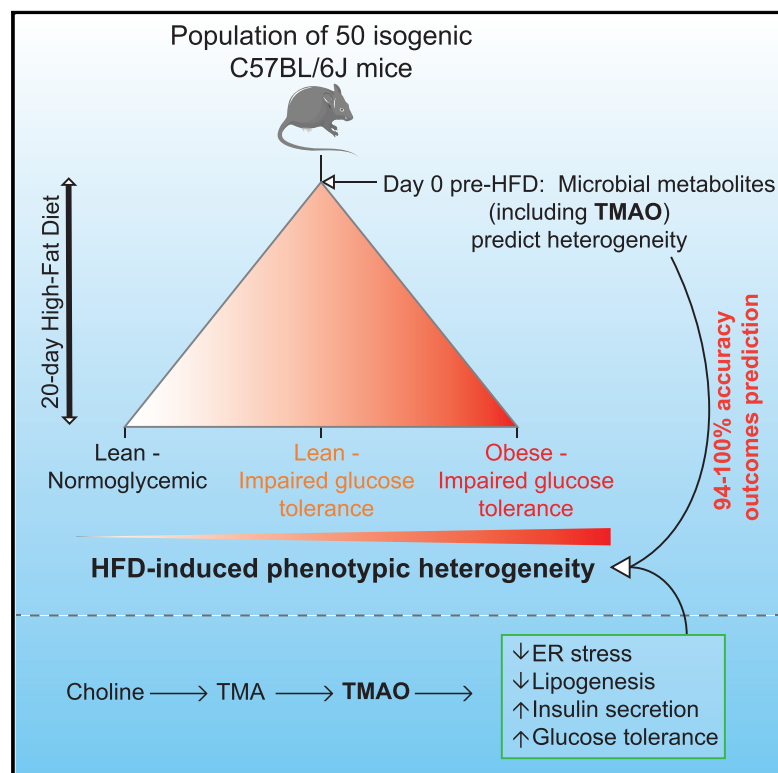

### Authors

Marc-Emmanuel Dumas, Alice R. Rothwell, Lesley Hoyles, ..., James Scott, Jeremy K. Nicholson, Dominique Gauguier

### Correspondence

m.dumas@imperial.ac.uk (M.-E.D.), dominique.gauguier@crc.jussieu.fr (D.G.)

### In Brief

Dumas et al. study the metabolic and behavioral phenotypic heterogeneity induced by a high-fat diet intervention in an isogenic mouse population model. Using  $^1\text{H-NMR}$  spectroscopy, they identify pre-interventional urinary metabolic signatures (including microbial-host co-metabolites) predicting future phenotypic heterogeneity. In particular, TMAO corrects endoplasmic reticulum stress and glucose tolerance.

### Highlights

- High-fat diet drives phenotypic heterogeneity in metabolism and behavior
- Microbial metabolites, including methylamines, predict phenotypic heterogeneity
- TMAO attenuates ER stress and reduces lipogenesis in adipocytes
- TMAO improves insulin secretion and restores glucose tolerance in vivo

### Accession Numbers

E-MTAB-2569

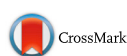

# Microbial-Host Co-metabolites Are Prodromal Markers Predicting Phenotypic Heterogeneity in Behavior, Obesity, and Impaired Glucose Tolerance

Marc-Emmanuel Dumas,<sup>1,5,6,7,\*</sup> Alice R. Rothwell,<sup>2,5</sup> Lesley Hoyles,<sup>1</sup> Thomas Aranas,<sup>3</sup> Julien Chilloux,<sup>1</sup> Sophie Calderari,<sup>3</sup> Elisa M. Noll,<sup>1</sup> Noémie Péan,<sup>3</sup> Claire L. Boulangé,<sup>1</sup> Christine Blancher,<sup>2</sup> Richard H. Barton,<sup>1</sup> Quan Gu,<sup>1</sup> Jane F. Fearnside,<sup>2</sup> Chloé Deshayes,<sup>1</sup> Christophe Hue,<sup>3</sup> James Scott,<sup>4</sup> Jeremy K. Nicholson,<sup>1,6</sup> and Dominique Gauguier<sup>1,2,3,6,\*</sup>

<sup>1</sup>Division of Computational and Systems Medicine, Department of Surgery and Cancer, Faculty of Medicine, Imperial College London, Sir Alexander Fleming Building, Exhibition Road, South Kensington, London SW7 2AZ, UK

<sup>2</sup>Wellcome Trust Centre for Human Genetics, University of Oxford, Roosevelt Drive, Oxford OX3 7BN, UK

<sup>3</sup>Cordeliers Research Centre, INSERM UMR\_S 1138, University Pierre & Marie Curie and University Paris Descartes, Sorbonne Paris Cité, Sorbonne Universities, 15 Rue de l'École de Médecine, 75006 Paris, France

<sup>4</sup>Department of Medicine, Imperial College London, Du Cane Road, London W12 0NN, UK

<sup>5</sup>These authors contributed equally

<sup>6</sup>Senior author

<sup>7</sup>Lead contact

\*Correspondence: [m.dumas@imperial.ac.uk](mailto:m.dumas@imperial.ac.uk) (M.-E.D.), [dominique.gauguier@crc.jussieu.fr](mailto:dominique.gauguier@crc.jussieu.fr) (D.G.)

<http://dx.doi.org/10.1016/j.celrep.2017.06.039>

## SUMMARY

The influence of the gut microbiome on metabolic and behavioral traits is widely accepted, though the microbiome-derived metabolites involved remain unclear. We carried out untargeted urine <sup>1</sup>H-NMR spectroscopy-based metabolic phenotyping in an isogenic C57BL/6J mouse population (n = 50) and show that microbial-host co-metabolites are prodromal (i.e., early) markers predicting future divergence in metabolic (obesity and glucose homeostasis) and behavioral (anxiety and activity) outcomes with 94%–100% accuracy. Some of these metabolites also modulate disease phenotypes, best illustrated by trimethylamine-*N*-oxide (TMAO), a product of microbial-host co-metabolism predicting future obesity, impaired glucose tolerance (IGT), and behavior while reducing endoplasmic reticulum stress and lipogenesis in 3T3-L1 adipocytes. Chronic *in vivo* TMAO treatment limits IGT in HFD-fed mice and isolated pancreatic islets by increasing insulin secretion. We highlight the prodromal potential of microbial metabolites to predict disease outcomes and their potential in shaping mammalian phenotypic heterogeneity.

## INTRODUCTION

Phenotypic heterogeneity is generally attributed to gene-environment interactions. However, phenotype variability is also commonly observed in identical twins and in isogenic model systems (Lehner, 2013), which can be exacerbated by high-fat diet (HFD) feeding in mice (Burcelin et al., 2002). This phenomenon

is associated with changes in gut microbial communities in isogenic mouse populations (Serino et al., 2012) and in monozygotic twins (Ridaura et al., 2013). With ~10 million genes (Li et al., 2014), there is growing evidence that the gut microbiome contributes to obesity (Cotillard et al., 2013; Le Chatelier et al., 2013; Turnbaugh et al., 2006) and type 2 diabetes (Karlsson et al., 2013; Qin et al., 2012) in the context of Western-style diets rich in saturated fats (David et al., 2014; Muegge et al., 2011). Fecal microbiota transplants (Smith et al., 2013; Turnbaugh et al., 2006) and metagenomic studies have highlighted the roles of microbiome architecture and richness (Cotillard et al., 2013; Le Chatelier et al., 2013).

However, beyond beneficial bacteria (Dao et al., 2016; Shoaie et al., 2015), the microbiome-derived mediators promoting host health or disease remain elusive: a few microbial metabolite families (e.g., short-chain fatty acids or bile acids) are known to affect human health (Dumas et al., 2014; Russell et al., 2013). To drive a shift in host physiology and potentially affect pathogenesis, microbial metabolite variation should precede changes in host metabolism and physiology and these metabolites should directly modulate traits associated with the disease. In this context, phenotypic heterogeneity observed in discordant twins or in populations of isogenic mice fed HFD offers a unique opportunity to evaluate microbial metabolites as early predictive (i.e., prodromal) markers of disease onset and progression and to assess their impact on disease (Hsiao et al., 2013; Venkatesh et al., 2014; Yoshimoto et al., 2013).

To evaluate microbial metabolites as prodromal markers, we repurposed a pharmaco-metabonomics framework (Clayton et al., 2006), which we developed initially for drug toxicity prediction using pre-dose metabolic phenotypes, to predict complex metabolic and behavior phenotype outcomes following HFD feeding in isogenic mouse populations. We best exemplify the influence of microbial-host co-metabolites through trimethylamine-*N*-oxide (TMAO), a phase 1 oxidation product of gut

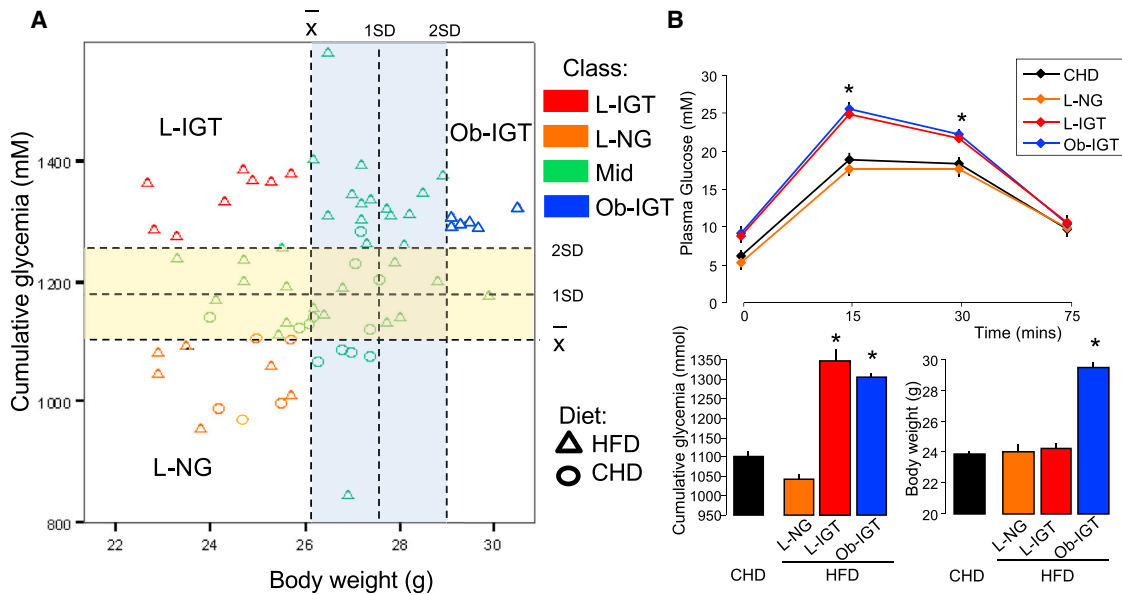

**Figure 1. HFD Induces Phenotypic Heterogeneity in an Isogenic Population of 50 C57BL/6J Mice within 3 Weeks**

(A) HFD feeding caused segregation of physiological phenotypes for diabetes (cumulative glycemia) and obesity (BW), and thresholds on cumulative glycemia and BW stratify the population into three disease sub-phenotypes: lean normoglycemic (LNG), lean impaired glucose tolerance (L-IGT), and obese impaired glucose tolerance (Ob-IGT).

(B) Short-term (3 weeks) HFD feeding generates heterogeneous phenotypes for BW and glucose tolerance in C57BL/6J male mice. Age-matched controls were fed a standard carbohydrate diet (CHD,  $n = 85-95$ ). Data are presented as means  $\pm$  SE. \* $p < 0.05$ , \*\* $p < 0.01$ , \*\*\* $p < 0.001$ .

See also Figures S1–S3.

microbial trimethylamine (TMA) that we observed first in insulin resistance (Dumas et al., 2006) and then with *Akkermansia muciniphila*'s beneficial effects on impaired glucose tolerance (Plovier et al., 2017) and that plays roles in atherosclerosis (Koeth et al., 2013; Tang et al., 2013; Wang et al., 2011b). In our study, methylamines predict impaired glucose tolerance (IGT) and obesity outcomes. TMAO reduces endoplasmic reticulum (ER) stress and lipogenesis in adipocytes, increases insulin secretion in isolated pancreatic islets, and attenuates diet-induced IGT, thus demonstrating dual prodromal and functional properties of microbiome-derived metabolites in health and disease (Dumas, 2011; Nicholson et al., 2012).

## RESULTS

### Phenotypic Heterogeneity Underpins IGT and Obesity in Isogenic Mouse Populations

To study the phenomenon of heterogeneous metabolic adaptation to HFD in mice (Burcelin et al., 2002; Serino et al., 2012), we generated a large population of isogenic C57BL/6J mice fed either chow diet (CHD) or HFD ( $n = 193$ ) for up to 5 months. HFD-fed mice became divergent from CHD-fed mice for IGT assessed by intraperitoneal glucose tolerance tests (IP-GTTs) and body weight phenotypes with strong and permanent heterogeneity in glucose tolerance and body weight (Figures S1A–S1C). Phenotype SDs for body weight (BW) and IGT progressively increased between 3 and 5 months of fat feeding and were greater in HFD-fed mice than in CHD-fed mice (Figure S1D). These preliminary results show that phenotypic heterogeneity

develops progressively over time and confirm that HFD feeding promotes this phenomenon.

We then bred a new cohort of 50 isogenic mice for in-depth characterization of the dietary-induced phenotype heterogeneity from 3 weeks of HFD feeding onward (Figure S1D). Outcomes from IP-GTT performed after 3 weeks of HFD feeding (Figure 1; Figure S2) and BW (Figure 1; Figure S3) were used to stratify the mouse population according to glucose tolerance (cumulative glycemia during the IP-GTT) and obesity phenotypes. Applying a threshold of 2 SD above the mean of cumulative glycemia and BW defined three disease sub-groups of extreme responders to HFD feeding: lean with impaired glucose tolerance (L-IGT), obese with impaired glucose tolerance (Ob-IGT), and non-responder lean normoglycemic (LNG) (Figure 1A). As expected, fasting glycemia in LNG mice ( $5.22 \pm 0.35$  mM) was not different from that of CHD-fed controls ( $6.14 \pm 0.11$  mM). Identical glycemic profiles during the IP-GTT in fat-fed LNG mice and in control CHD-fed mice confirms the resistance of LNG mice to the dietary challenge (Figure 1B). In addition, fasting glycemia was significantly lower in these groups than in L-IGT mice ( $9.12 \pm 0.87$  mM,  $p = 0.001$ ) and Ob-IGT mice ( $8.90 \pm 0.67$  mM,  $p < 0.001$ ) (Figure 1B; Figure S2). Fat-fed mice from the Ob-IGT, LNG, and L-IGT groups were identified in parallel in several cages, thus ruling out possible cage effects (Ridaura et al., 2013) on phenotypes.

### Extreme HFD Responders Have Altered Insulin Secretion, Adiposity, and Lipids

To extend the in vivo physiological screening of extreme responders, we determined insulin during the IP-GTT, adiposity

index (ratio of adipose weight to body weight), and plasma lipids. Even though glucose-stimulated insulin secretion was not used for stratification of the mouse groups, the glucose-intolerant groups *L-IGT* and *Ob-IGT* are hyperinsulinemic compared to *LNG* mice (Figures S2B and S2E). Pre-intervention BWs at 5 weeks were not significantly different among any of these sub-groups, but BMI, BW gain, and the weights of the epididymal fat pad (EPD), retroperitoneal fat pad (RFP), and brown adipose tissue (BAT) diverged in the *Ob-IGT* group compared to other groups ( $p < 0.001$ ) (Figures S3A–S3I) at day 20. The obese group had significantly lower plasma high-density lipoprotein (HDL) and higher plasma triglycerides than the lean groups, while the glucose-intolerant group *L-IGT* had significantly more plasma low-density lipoprotein (LDL) than the *LNG* mice, suggestive of stratification-associated dyslipidemia in obese (*Ob*) and *IGT* mice (Figures S3J–S3M).

### HFD Induces Heterogeneity in Behavior

Because mice exhibiting extreme glucose tolerance and body weight were systematically observed in different cages, we hypothesized that heterogeneous metabolic adaptation to HFD may involve behavioral traits, which we characterized using robust procedures in *Ob-IGT*, *LNG*, and *L-IGT* mice (Figure S4). Time spent in the elevated plus maze (EPM) closed arms and latency to enter the open field (OF) central arena show similar patterns, supporting inter-test validity. EPM activity and anxiety generally increased with *IGT* between *LNG* and *Ob-IGT* mice (Figures S4A and S4B). This was reflected by the increased number of entries in the closed EPM arms in *Ob-IGT* mice ( $11.7 \pm 1.0$ ) compared with *LNG* mice ( $8.8 \pm 0.8$ ) ( $p = 0.026$ ) and the increased time spent in the EPM center in *Ob-IGT* mice ( $76.5 \pm 8.7$ ) and *L-IGT* mice ( $80.5 \pm 4.8$ ) compared with *LNG* mice ( $59.0 \pm 7.3$ ) ( $p < 0.05$ ). *Ob-IGT* mice also showed a significantly higher number of rearings ( $p = 0.04$ ) and transitions in the OF when compared to lean mice. Activity parameters in the OF (number of rearings and transition) were increased in *Ob-IGT* mice compared to *LNG* mice ( $p = 0.04$ ) (Figures S4C and S4D). Altogether, these results show that HFD induces heterogeneous metabolic, hormonal, and behavioral changes characterized by increased anxiety and activity in mice showing impaired glucose homeostasis and increased BW.

### Metabolic Phenotypes Mirror Phenotypic Variability

To identify metabolic signatures associated with heterogeneous adaptation to HFD, we performed  $^1\text{H-NMR}$ -based untargeted metabolic phenotyping (i.e., metabolotyping) (Gavaghan et al., 2000) of 24 hr urinary collections obtained at baseline before dietary intervention (5 weeks of age, day 0), and 1, 2, and 20 days (8 weeks of age) after intervention. An orthogonal partial least-squares discriminant analysis (O-PLS-DA) constructed using all urines clearly discriminated CHD from HFD samples ( $p = 10^{-4}$ ) (Figure 2A). The O-PLS-DA model was highly predictive when randomly resampled 10,000 times (Figure 2B), and detailed structural assignment (Table S1) confirmed that the methylamine pathway is activated in HFD (Figure 2C), as initially reported (Dumas et al., 2006): TMA is derived from dietary choline fermentation by

commensal bacteria, and metabolized into TMAO, dimethylamine (DMA), and monomethylamine (MMA) in the liver (Figure 2D) (al-Waiz et al., 1992; Craciun and Balskus, 2012; Dolphin et al., 1997).

### Predictive Modeling of Disease Sub-groups and Quantitative Phenotypes

To test whether pre-intervention metabolotypes can predict future disease outcome, we built a series of O-PLS-DA models predicting disease sub-groups after 20-day HFD from baseline urinary metabolic phenotypes at day 0. We implemented a 7-fold cross-validation strategy to assess the performance of the models: the cross-validated score plots show a clear prediction of glycemia and obesity sub-phenotypes (Figure 3A). We also resampled our predictions using 10,000 random permutations and rederived goodness-of-prediction  $Q^2_{\text{Yhat}}$  parameters by 7-fold cross-validation, demonstrating the original O-PLS-DA models were significantly different from 10,000 random cross-validated models, with  $p = 0.0099$ – $0.0487$  (Figure 3B). We then evaluated the performance of the predictive O-PLS-DA cross-validated scores in a receiver-operating characteristic (ROC) analysis. The area under the ROC curve (AUC), corresponding to discriminative power ranged from 94% to 100% (Figure 3C). We built and permutation validated a series of predictive O-PLS-DA models showing significant segregation of the original models for the following sub-phenotypes: extreme ( $Q^2_{\text{Yhat}} = 0.67$ ,  $p = 0.0116$ , AUC = 100%), lean from *Ob* ( $Q^2_{\text{Yhat}} = 0.36$ ,  $p = 0.0099$ , AUC = 94%), normoglycemic from *IGT* ( $Q^2_{\text{Yhat}} = 0.37$ ,  $p = 0.0142$ , AUC = 98.6%), and *LNG* from *L-IGT* ( $Q^2_{\text{Yhat}} = 0.50$ ,  $p = 0.0487$ , AUC = 94.29%).

We also computed O-PLS regressions between urinary metabolotypes and the 44 physiological or behavioral quantitative phenotypes measured at day 20 using the whole cohort of HFD-fed mice (Table 1). Permutation testing showed that 25 of 44 quantitative phenotypes after 3 weeks of HFD feeding were significantly predicted using baseline (i.e., before HFD challenge) urinary metabolotypes. In particular, pre-interventional metabolotypes predict not only BW at baseline ( $p = 0.0007$ ) and after a 3-week HFD ( $p = 0.0034$ ) but also BMI ( $p = 0.0362$ ), BW gain ( $p = 0.0001$ ), fasting glycemia ( $p = 0.012$ ), cumulative glycemia and insulinemia, heart and fat pad (EPD and RFP) weights, and even behavioral traits (number of rearings in OF,  $p = 0.0122$ ). These data suggest that HFD heavily disturbs microbial and host metabolism overnight with gradual and often phenotype-specific heterogeneity.

### Prodromal Predictors of Disease Outcomes and Quantitative Traits

We next identified metabolic markers for phenotypic heterogeneity using empirical  $p$  values generated for Spearman's rank correlation with 10,000 random permutations. The patterns of association between urinary metabolites and physiological phenotypes are complex, with multiple partial contributions from one metabolite to each phenotype (Figure 3D). For instance, heart weight is predicted by increased excretion of tricarboxylic acid (TCA) cycle intermediates (citrate, 2-oxoglutarate, fumarate, and succinate), as well as choline and *N-N*-dimethylglycine (DMG). We show that excretion of gut microbial metabolites,

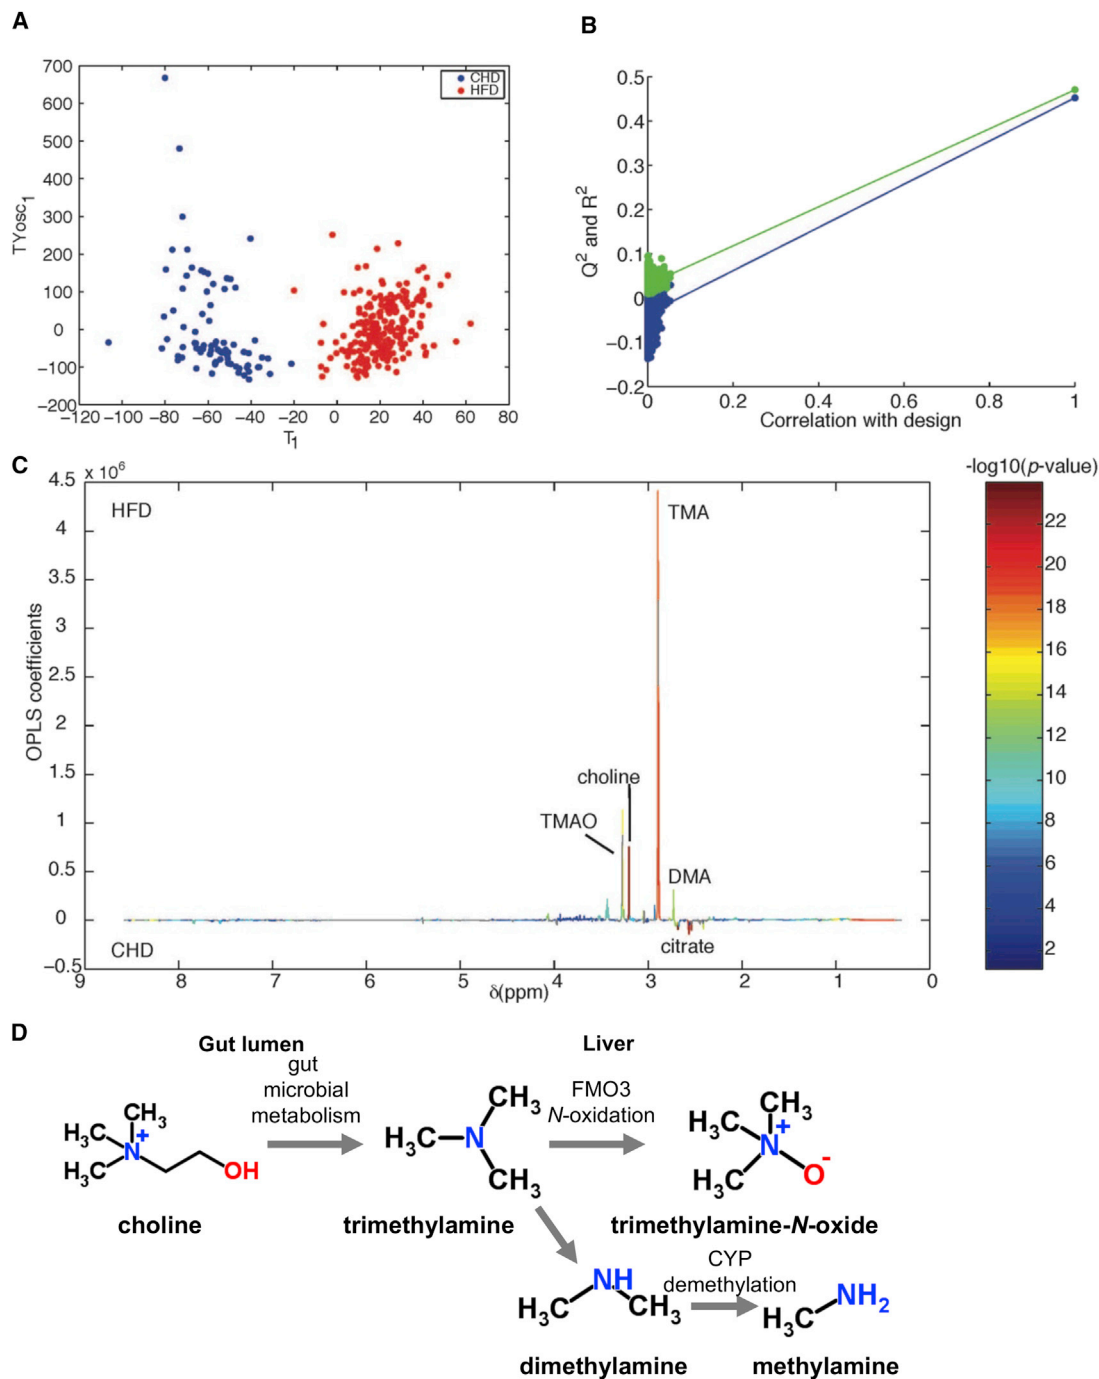

**Figure 2. The Urinary Metabolic Signature of HFD in the C57 Mouse**

(A) O-PLS-DA scores plot.

(B) O-PLS-DA permutation plot. The O-PLS-DA model was validated by random permutations ( $n = 10,000$  iterations) of the original variable to explain class membership (CHD versus HFD). The horizontal axis represents the correlation between the original class membership (right) and the randomly permuted class membership vectors (no longer correlated with the original class membership) (left). The y axis represents the goodness-of-fit  $R^2$  (in green) parameter obtained for each O-PLS-DA model and the goodness-of-prediction  $Q^2$  (in blue) parameter obtained by 7-fold cross-validation of the O-PLS-DA model. The  $R^2$  and  $Q^2$  parameters for the original model in the top right corner do not belong to the population of 10,000 models fitted with random class memberships, highlighting that the original model does not belong to the population of 10,000 randomly permuted models ( $p < 0.0001$ ) and thereby confirming the significance of the fitness and prediction ability attached with the original O-PLS-DA model.

(C) O-PLS-DA model coefficient plot.

(D) Summary of microbial-mammalian co-metabolism of methylamines.

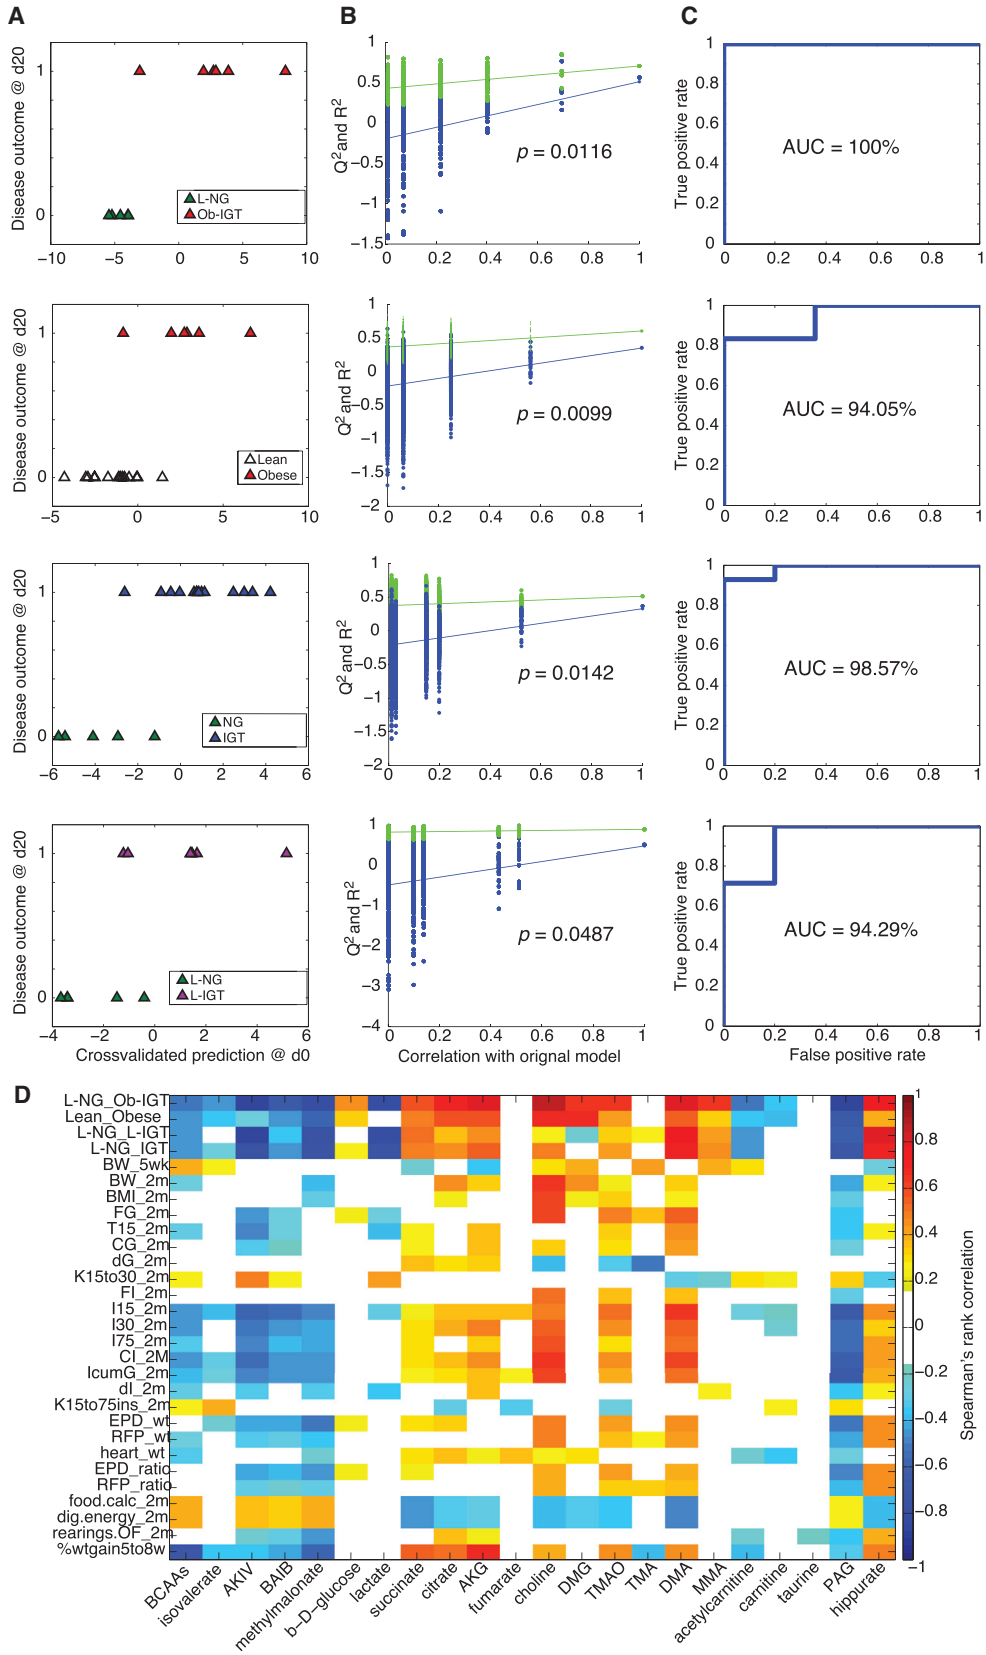

(legend on next page)



including methylamines, predicts several physiological and behavioral traits (Figure 3D). Pre-interventional excretion of choline, TMAO, DMA, and MMA predicts not only IGT and obesity but also stratification of the mouse population into *Ob-IGT* and *L-IGT* disease sub-groups and finally heterogeneity of quantitative phenotypes, i.e., fat pad (EPD and RFP) weights (raw and normalized to total BW), BMI, or food consumption traits. Baseline TMAO excretion predicts obesity and IGT outcomes (BW, BMI, BW gain, EPD weight and ratio, glycemia, and insulinemia). In contrast, urinary TMA presents weaker associations and is negatively correlated to disease sub-groups (Figure 3D). Methylamines (TMA, DMA, MMA, and TMAO) and their pre-cursor choline are the major metabolites associated with HFD in the C57BL/6J mouse (Figure 2D), which is consistent with our previous report (Dumas et al., 2006). Other microbial-host co-metabolites, such as phenylacetylglycine (PAG) and hippurate, are also predictive of disease risk, BW, glycemia, insulinemia, feeding behavior, and anxiety parameters, suggesting that symbiotic metabolism also predicts future anxiety and activity patterns (Figure 3D).

### TMAO Correlates with Lower Adipose ER-Stress Response and Insulin Signaling

We focused on TMAO as the product of the main microbial-host co-metabolic pathway significantly associated in our study (choline, TMA, DMA, MMA, and TMAO) (Figures 2 and 3). Details of TMAO action on obesity and adipocyte function remain unknown. After 3 weeks of HFD, TMAO excretion is negatively associated with EPD weight and the ratio of EPD weight to body weight observed 20 days post-HFD ( $r = -0.302$  and  $-0.291$ , respectively). We profiled the transcriptome in EPD from HFD-fed mice belonging to the *LNG*, *LD*, and *Ob-IGT* continuum and characterized by glucose tolerance and body weight within 2 SD of the mean for these phenotypes (i.e., midgroup) (Figure 4; Table S2). Permutation testing identified 2,875 genes correlated with TMAO excretion at day 20 (Figure 4A; Table S2). This transcriptomic correlation pattern accounts for combined effects of TMAO and other metabolites associated with extreme adaptations of mice to HFD (e.g., hippurate and PAG) and consequences of altered physiological and behavioral phenotypes. A gene ontology analysis (Table S3) highlights a coordi-

nated regulation involving response to endoplasmic reticulum stress, regulation of lipid biosynthetic process, insulin receptor signaling pathway, and fat cell differentiation. Protein processing, ER-associated degradation, and ubiquitin-ligase complex are strikingly anti-correlated with TMAO (Figure 4B; Table S3). Under ER stress conditions, *Ire1* cleaves a 26-nucleotide intron from the *Xbp1* mRNA (*Nfx1*,  $r = -0.51$ ,  $p = 0.0456$ ), leading to spliced *Xbp1* mRNA encoding for a transcription factor promoting expression of unfolded protein response (UPR) genes (Hotamisligil, 2010). Splicing of the *Xbp1* transcript is also required for adipogenesis (Sha et al., 2009).

### TMAO Reduces ER Stress and Lipid Accumulation in Adipocytes

To confirm that TMAO reduces ER stress and lipid metabolism, we tested these effects with 3T3-L1 adipocyte cell-based assays. We first assessed *Xbp1* splicing, because splicing of this central ER stress regulator is induced by ER stress and was validated as an ER stress marker recapitulating all other events in the IRE1a-XBP1 pathway (van Schadewijk et al., 2012). We confirmed that 0.1 mM TMAO inhibits tunicamycin-stimulated *Xbp1* splicing as efficiently as 0.1 mM 4-phenylbutyrate (PBA) (Figure 4C), an ER stress inhibitor also known to inhibit lipogenesis (Basseri et al., 2009). TMAO inhibits adipogenesis, as shown by decreased lipid accumulation (Figure 4D), which concurs with the negative association between TMAO excretion and the ratio of both EPD weight and EPD weight to body weight observed 20 days post-HFD ( $r = -0.302$  and  $-0.291$ , respectively). These results show that TMAO, a known chemical chaperone (Ozcan et al., 2006), alleviates ER stress at 0.1 mM, as suggested by gene expression results, and impairs adipogenesis. Given that TMAO was also shown to reduce ER stress in  $\beta$  cells (Akerfeldt et al., 2008), we then tested the role of TMAO on glucose tolerance and insulin secretion in vivo in mice and in vitro in isolated islets.

### TMAO Improves Glucose Homeostasis and Insulin Secretion In Vivo

To assess potential therapeutic effects of TMAO in vivo, we carried out glucose tolerance and insulin secretion tests in CHD- and HFD-fed mice treated by chronic subcutaneous

### Figure 3. Pre-intervention Metabotypes Predict Disease Outcome and Phenotypic Heterogeneity

- (A) Pre-intervention (day 0) urinary  $^1\text{H-NMR}$ -based metabolic profiles predict disease outcome (day 20, after a 3-week HFD challenge).  
 (B) Model goodness-of-fit ( $R^2$ ) and goodness-of-prediction ( $Q^2$ ) parameters are significantly different from those expected by chance in a permutation test (empirical  $p$  value derived from 10,000 iterations).  
 (C) Receiver-operating characteristic (ROC) curves demonstrate efficient prediction of future disease outcomes.  
 (D) Heatmap of significant metabolic predictors of disease and quantitative phenotype outcomes present complex yet structured patterns (see Table S1 for assignments). The heatmap was built using significant Spearman's rank-based correlations after 10,000 random permutation testing between day 0 urinary metabolites and day 20 heterogeneous phenotypes. Only significant correlations (permutation testing  $p < 0.05$ ) are color-coded on the heatmap; non-significant correlations are left uncolored (white). BCAA, branched chain amino acids.  
 Phenotypes were determined in mice at 5 weeks (5wk) or 2 months (2m). Glucose tolerance tests were used to determine glycemia 15 min after glucose injection (T15); cumulative glycemia (CG); cumulative glycemia above baseline (dG); the disappearance rate of glucose from blood, in minutes (K15to30 and K15to75ins); insulin secretion 15, 30, and 75 min after glucose injection (I15, I30, and I75, respectively); cumulative insulinemia (CI); cumulative insulinemia above baseline (dI); and the ratio of cumulative glycemia to cumulative insulinemia (IcumG). BW, body weight; BMI, body mass index; FG, fasting glycemia; FI, fasting insulinemia; AUC, area under the curve during the intraperitoneal glucose tolerance test (IP-GTT); EPD, epididymal fat pad; EDP\_ratio, EPD weight to BW ratio; RFP, retroperitoneal fat pad; RFP\_ratio, RFP weight to BW ratio; L, Lean; Ob, obese; IGT; impaired glucose tolerance; OF, open field; dig.energy, digestible energy; food.calc, food intake; AKIV, alpha-keto-isovalerate; BAIB, beta-aminoisobutyrate; AKG, 2-oxoglutarate; DMG, *N,N*-dimethylglycine. See Table 1 for other abbreviations.

**Table 1. Predictions for Quantitative Physiological and Disease Phenotypes**

| Phenotype Day 20              | Day 0 (p Value) | Day 1 (p Value) | Day 2 (p Value) | Day 20 (p Value) |
|-------------------------------|-----------------|-----------------|-----------------|------------------|
| BW baseline (day 0)           | 0.0007          | 0.0001          | 0.0001          | NS               |
| BW                            | 0.0034          | 0.0005          | 0.0012          | 0.0269           |
| BMI                           | 0.0362          | 0.0054          | 0.0005          | 0.0059           |
| Fasting glycemia              | 0.0012          | 0.0079          | NS              | 0.0121           |
| Glycemia 15 min IP-GTT        | 0.0008          | 0.0429          | 0.0341          | 0.0105           |
| Glycemia 30 min IP-GTT        | NS              | NS              | NS              | 0.0269           |
| Glycemia 75 min IP-GTT        | NS              | 0.0174          | NS              | NS               |
| AUC glycemia IP-GTT           | 0.0246          | NS              | NS              | 0.0282           |
| Delta glycemia IP-GTT         | 0.0133          | 0.0109          | NS              | NS               |
| K parameter (glycemia) IP-GTT | 0.0236          | 0.0225          | 0.0055          | NS               |
| Fasting insulinemia           | 0.0095          | NS              | 0.041           | NS               |
| Insulinemia 15 min IP-GTT     | 0.0001          | 0.0004          | 0.0019          | 0.0028           |
| Insulinemia 30 min IP-GTT     | 0.0009          | NS              | 0.0028          | NS               |
| Insulinemia 75 min IP-GTT     | 0.0012          | NS              | NS              | 0.033            |
| AUC insulinemia IP-GTT        | 0.0001          | 0.0411          | 0.0051          | 0.0266           |
| AUC(I)/AUC(G) IP-GTT          | 0.0002          | NS              | 0.0113          | NS               |
| Delta insulinemia IP-GTT      | 0.0154          | 0.0034          | 0.0012          | NS               |
| K parameter (insulin) IP-GTT  | 0.0122          | 0.0411          | 0.0125          | 0.0152           |
| EPD weight                    | 0.0146          | NS              | 0.0057          | 0.014            |
| RFP weight                    | 0.0243          | NS              | NS              | NS               |
| BAT weight                    | NS              | NS              | 0.0368          | 0.0024           |
| Heart weight                  | 0.0001          | 0.0005          | 0.0109          | 0.0392           |
| EPD weight/BW (%)             | 0.0058          | NS              | 0.0024          | 0.0102           |
| RFP weight/BW (%)             | 0.0343          | NS              | NS              | 0.0341           |
| BAT weight/BW (%)             | NS              | NS              | NS              | 0.0034           |
| Heart weight/BW (%)           | NS              | NS              | NS              | 0.0175           |
| Food intake                   | 0.0051          | 0.0228          | 0.0008          | NS               |
| Entries open arm              | NS              | NS              | NS              | 0.0295           |
| Time to enter open arm        | NS              | 0.0388          | NS              | 0.0155           |
| Digestible energy             | 0.0042          | 0.0233          | 0.0008          | NS               |
| Rearings (OF)                 | 0.0122          | 0.0374          | 0.0489          | NS               |
| BW gain day 0–20              | 0.0001          | 0.0001          | 0.0001          | NS               |

O-PLS regression models predicting each quantitative phenotype variable using metabolic profiles ( $n = 44$ ) at a given time point (day 0, day 1, day 2, or day 20) were assessed by permutation testing. The p values for the  $Q^2_{\text{Yhat}}$  model prediction parameter were obtained by random permutation testing with 10,000 iterations. Then, the original  $Q^2_{\text{Yhat}}$  is projected on the confidence interval of the population of 10,000  $Q^2_{\text{Yhat}}$  values obtained from each random model to derive a non-parametric empirical p value. BW, body weight; AUC, area under the curve during the intraperitoneal glucose tolerance test (IP-GTT); EPD, epididymal fat pad; RFP, retroperitoneal fat pad; BAT, brown adipose tissue; OF, open field; NS, not statistically significant.

infusion of this compound (Figure 5). HFD feeding resulted in significant elevation of fasting glycemia and insulinemia, glucose intolerance, enhanced insulin secretion induced by glucose, and increased BW after 7 weeks when compared to CHD-fed mice. TMAO infusion had no effect on glucose homeostasis, insulin secretion, or BW in CHD-fed mice (Figure 5E). In contrast, glucose tolerance (Figures 5A and 5B) was partially restored by chronic 6-week TMAO treatment in HFD-fed mice, as indicated by significant reduction of glycemia during the IP-GTT (Figure 5A) and cumulative glycemia during the test (Figure 5B) in TMAO-treated mice when compared to saline-treated controls. Improved glucose tolerance in TMAO-treated, HFD-fed mice was associated with further significant enhancement of insulin

secretion response to glucose by TMAO in these mice (Figures 5C and 5D). We noted a tendency of TMAO to reduce body weight in mice fed HFD during the final 3 weeks of TMAO administration (Figure 5E), but differences were not statistically significant and the TMAO treatment could not be prolonged beyond 6 weeks for technical reasons. We then confirmed that TMAO directly increases insulin secretion in isolated islets (Figure 5F), which is consistent with its role as a chemical chaperone reducing ER stress in  $\beta$  cells (Akerfeldt et al., 2008). The partial IGT normalization induced by subcutaneous TMAO treatment in HFD-fed mice only suggests that TMAO's beneficial role in the regulation of glucose homeostasis and insulin secretion is dependent of an interaction with diet.



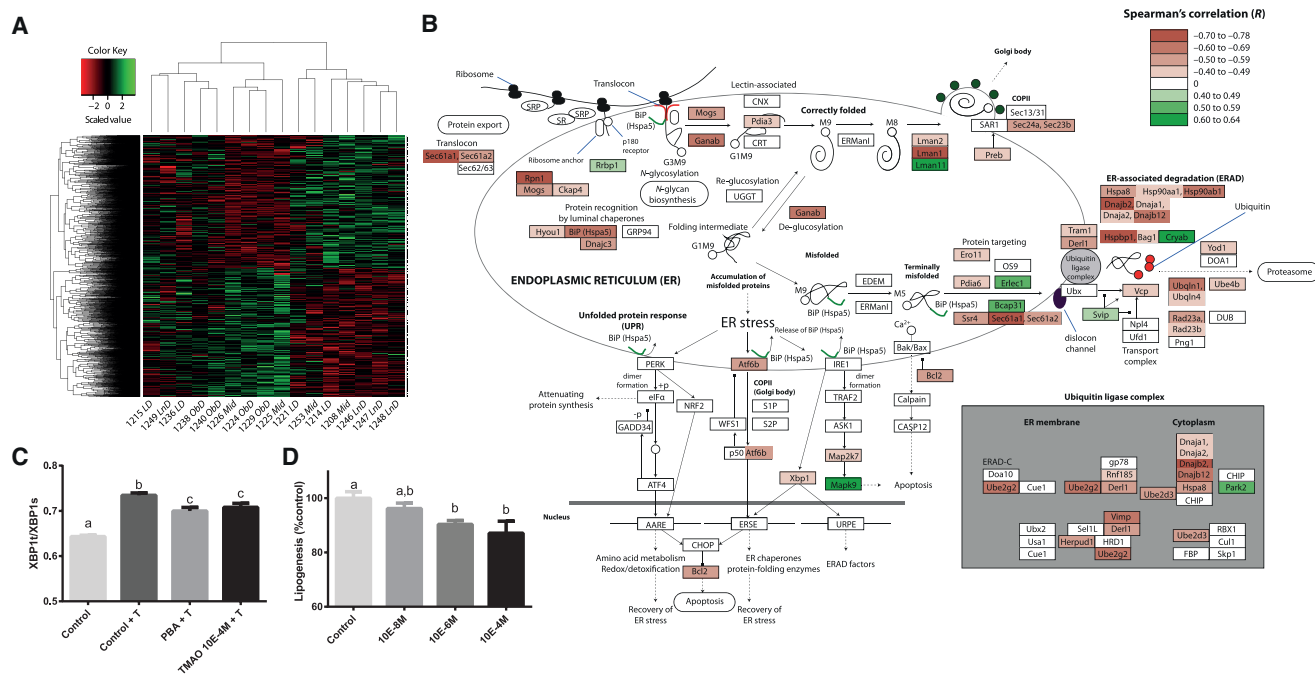

**Figure 4. TMAO Alleviates ER Stress**

(A) The 2,875 EPD genes significantly correlate with TMAO excretion after 20-day HFD. See also Table S2. (B) TMAO correlates with reduced expression of ER stress genes. See also Tables S3 and S4. (C) TMAO reduces ER stress in differentiating 3T3-L1 adipocytes. Data were derived from six replicates of three cell preparations. (D) TMAO reduces lipid accumulation in 3T3-L1 adipocytes. Data were derived from six replicates of three independent cell preparations. Data are presented as means ± SEM. T, tunicamycin; PBA, 4-phenylbutyrate. A one-way ANOVA was performed to identify significantly different factor levels, denoted as a–c ( $p < 0.05$  post hoc test). The pathway of protein degradation in the ER was redrawn from Kyoto Encyclopedia of Genes and Genomes (KEGG), with KEGG annotations substituted for gene annotations in cases of significant differences.

**DISCUSSION**

Our results shed new light on metabolic roles of the gut microbiome in shaping host phenotypic heterogeneity and pre-disposition to disease susceptibility. Pre-intervention urinary metabolites predict post-interventional disease outcomes and quantitative heterogeneity for a large number of traits (metabolic, hormonal, organ weights, and behavior) in isogenic mice. Microbial metabolites and their detoxification products belong to this prodromal signature, including microbial TMA and its product TMAO, which alleviates ER stress and reduces lipogenesis in cell-based assays, as well as improving glucose homeostasis by stimulating insulin production by pancreatic islets in vivo and in vitro.

**Microbiome-Driven Phenotypic Heterogeneity in Isogenic Mouse Populations**

Variability of disease phenotypes in response to HFD in isogenic C57BL/6J mouse populations was proposed by Burcelin et al. (2002) as an alternative to diet-based comparisons; removing unwanted dietary confounders allowed the study of the role of microbial variations within this population (Serino et al., 2012). In our study, although the extreme groups were defined only on cumulative glycemia and BW, we observed a co-segregation

of multiple traits, such as insulin secretion, blood lipids, organ weights, and behavior.

**Pre-dietary Intervention Metabolic Profiles Predict Disease Outcomes**

By combining the isogenic mouse population model with a pharmaco-metabonomic approach, phenotypic heterogeneity in absence of genetic variation can be directly predicted by specific microbial-host co-metabolites, which could not be inferred through 16 s rRNA phylogenetic analysis (Serino et al., 2012). We show that pre-intervention urinary metabolites predict post-intervention disease outcome and behavior patterns, thus showing that the pharmaco-metabonomics concept also applies to nutritional interventions and the prediction of disease risks or outcomes. The complexity of the metabolic patterns identified in our study suggests that each trait has a specific metabolic signature that is only similar to the signatures of other co-associated traits, which are best exemplified by BW, BMI, BW gain, and EPD and RFP weights or glycemic and insulinemic traits.

**Microbial-Host Co-metabolites Are Prodromal Markers of Phenotypic Heterogeneity**

Several endogenous and microbial metabolites were identified in the predictive signatures for diabetes and obesity outcomes. In

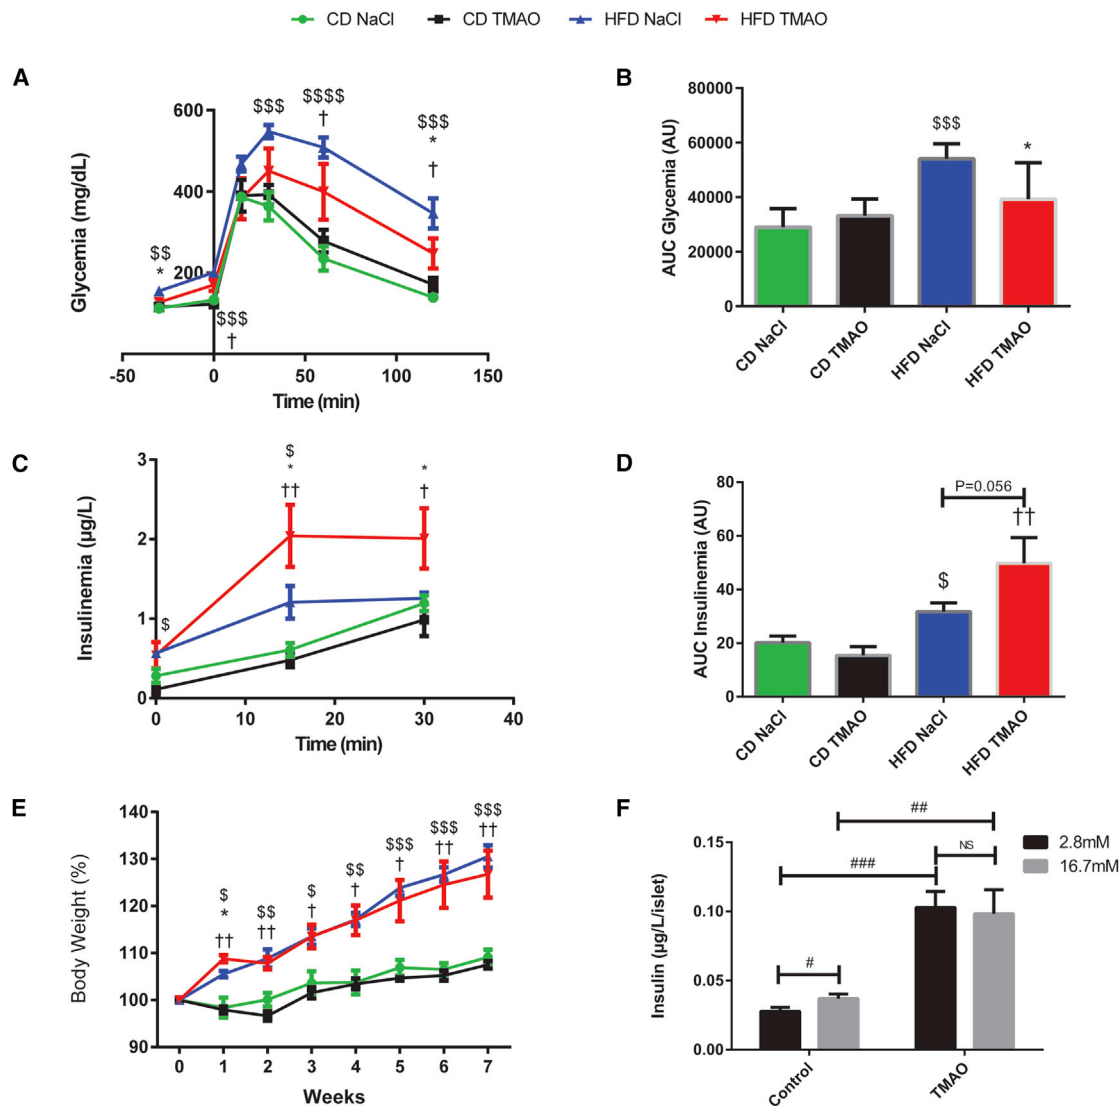

**Figure 5. TMAO Partially Improves Glucose Tolerance on HFD through Increased Insulin Secretion**

(A) Plasma glucose profile during IP-GTT.

(B) Cumulative glycemia (AUC).

(C) Plasma insulin profile during IP-GTT.

(D) Cumulative insulinemia (AUC).

(E) Weekly BW monitoring.

(F) Primary pancreatic islet insulin secretion.

Glycemia and insulinemia were determined following an injection of glucose (2 g/kg BW) in control or HFD-fed mice treated by TMAO or NaCl for 5 weeks ( $n = 5$  per group). BW was monitored throughout the duration of the experiment. The effect of TMAO on insulin production was tested in pancreatic islets cells ( $n = 20$  mice, 1,705 islets in total) in response to 2.8 or 16.7 mM glucose. \$ $p < 0.05$  for control diet (CD) NaCl versus HFD NaCl, \* $p < 0.05$  for HFD NaCl versus HFD TMAO, † $p < 0.05$  for HFD TMAO versus CD NaCl. # $p < 0.05$ , ## $p < 0.01$ , ### $p < 0.001$ . Data are presented as means  $\pm$  SEM.

particular, TMAO, PAG, and hippurate are three microbial-mammalian co-metabolites obtained by phase 1 and phase 2 reactions in liver from their gut microbial substrates (TMA, phenylacetate, and benzoate, respectively). We observed that variations in baseline (i.e., before HFD induction) excretion of TMAO and hippurate are strongly predictive of obesity risk. We previously showed that hippurate is negatively associated with BMI in humans (Elliott et al., 2015) and that benzoate variation was

associated with a UGT2b polymorphism in the Goto-Kakizaki rat model of type 2 diabetes (Dumas et al., 2007). Post-intervention TMAO excretion was anti-correlated with obesity traits and was associated with a reduction of the expression of key enzymes involved in energy metabolism, lipid biosynthesis, and insulin signaling in adipose tissue. These observations support reports on the impact of the gut microbiome on brain development and anxiety behavior (Diaz Heijtz et al., 2011), while antibiotic

therapy (Bercik et al., 2011) or *Lactobacillus* spp. supplementation (Bravo et al., 2011) affects behavior. In addition, *Bacteroides fragilis* affects the gut barrier in autism spectrum disorder mice, with circulating levels of microbial metabolites such as 4-ethylphenylsulfate eventually affecting their behavior (Hsiao et al., 2013).

### TMAO and Cardiometabolism

Methylamines represent the main microbial-mammalian co-metabolic pathway associated with HFD in our mouse model. TMAO results from a phase 1 *N*-oxidation of gut microbial TMA (al-Waiz et al., 1992) catabolized by FMO3 in humans (Dolphin et al., 1997). TMA is synthesized by gut microbial degradation of nitrogen-rich nutrients such as choline, phosphatidylcholine, and L-carnitine in decreasing order (al-Waiz et al., 1992; Russell et al., 2013). FMO3 is a target gene of the bile acid receptor FXR (Bennett et al., 2013) and was shown to play a central role in the regulation of cholesterol balance and glucose homeostasis (Warrier et al., 2015). This led to the establishment of a preliminary disease mechanism model in which TMAO and its dietary pre-cursors such as phosphatidylcholine and L-carnitine, found in red meat, could explain the increased cardiovascular disease (CVD) risk associated with red meat consumption (Koeth et al., 2013). While the association between TMAO and atherosclerosis initially reported by Tang et al. (2013) is now accepted (Bennett et al., 2013; Koeth et al., 2013, 2014; Ussher et al., 2013; Wang et al., 2011b), the roles played by TMAO in glucose homeostasis are less clear (Bai et al., 1998; Gao et al., 2014; Lever et al., 2014; McEntyre et al., 2015).

### TMAO Alleviates ER Stress

Our results suggest that TMAO exposure reduces ER stress, resulting from the accumulation of misfolded proteins in the ER (Ozcan et al., 2006). This gene expression signature is particularly relevant because TMAO is an osmolyte acting as a chemical chaperone and stabilizing a three-dimensional protein structure, a role that was initially discovered in saltwater fish (Yancey et al., 1982). This general protein stabilization mechanism (Ma et al., 2014) is thought to reduce ER stress, which is involved in inflammation and insulin resistance (Ozcan et al., 2006), and could explain our observations for the role of TMAO on ER stress and *Xbp1* splicing in adipocytes. Similarly, TMAO corrects ER stress and *Xbp1* splicing induced by cytokines and palmitate in  $\beta$  cells (Akerfeldt et al., 2008).

### TMAO Infusion Improves Glucose Homeostasis, but Not Obesity, in Mice

Several conflicting studies exist about TMAO's role on glucose homeostasis. The existing literature suggests that both dietary TMAO and FMO3 overexpression exacerbate IGT, whereas FMO3 is downregulated by insulin (Gao et al., 2014; Miao et al., 2015). To bypass indirect FMO3-specific effects (Bennett et al., 2013; Miao et al., 2015) triggered by potential microbial retroversion (Al-Waiz et al., 1987), we performed subcutaneous TMAO administration. The lack of effect of TMAO treatment on BW and BMI in HFD-fed mice supports the view that despite *Xbp1*'s central role in ER stress, adipocyte-specific *Xbp1* deletion does not affect obesity (Gregor et al., 2013). However, the

marked improvement of HFD-induced IGT mediated by increased insulinemia, which we confirmed in vitro by treating isolated pancreatic islets with TMAO, is consistent with improved ER stress. Dietary TMAO was reported to exacerbate HFD-induced IGT after 3 weeks of feeding in male mice (Gao et al., 2014), whereas a previous report showed that subcutaneous or intraperitoneal TMAO injections lower glycemia (Bai et al., 1998). The beneficial effects of our 6-week subcutaneous TMAO infusion resulting in a partial correction of IGT through increased insulin secretion support the latter report. Our results are also consistent with the recent association of methylamines in general (and TMAO in particular) with the beneficial effects of *Akkermansia muciniphila* treatment in HFD-fed mice (Plovier et al., 2017). Analysis of long-term TMAO effects on  $\beta$  cell function and replication of the experiment in mice treated with oral administration of TMAO should improve our understanding of the impact of TMAO on glucose homeostasis and insulin secretion.

In conclusion, through extensive phenotyping, metabolomic, and transcriptomic studies, we show that microbial metabolites are prodromal markers and drivers of diet-induced phenotypic heterogeneity in isogenic mouse populations. We highlight a novel beneficial role for TMAO in glucose homeostasis and insulin secretion. Our work supports the emerging view that the gut microbiome can pre-dispose host health, opening perspectives in terms of predicting and monitoring functional effectiveness of dietary and microbiome interventions in stratified medicine.

## EXPERIMENTAL PROCEDURES

### Animals

All experiments were approved by the ethical committees of the University of Oxford and University Pierre & Marie Curie. Male C57BL/6J mice were bred in the laboratory. All mice were kept under standard maintenance conditions on 12 hr light/dark cycle.

### Heterogeneous Mouse Populations

Mice were weaned at 21 days and caged in groups of ten throughout the whole experiment. Mice were fed a normal carbohydrate (CHD) diet containing 5% fat, 19% protein, and 3.5% fiber (w/w). At 5 weeks, a group of mice ( $n = 50$ – $193$ ) was transferred to a 40% w/w (65% kcal) (HFD) ad libitum, while a group of age-matched mice remained on CHD throughout the experiment as described previously (Dumas et al., 2006; Fearnside et al., 2008). Blood and urine samples were collected in both groups. Metabolic homeostasis was assessed by glucose tolerance tests after 3 weeks of treatment. Animals were then killed by CO<sub>2</sub> asphyxiation. Tissues were collected, weighed, and snap-frozen in liquid nitrogen.

### TMAO Infusion

Six-week-old C57BL/6J mice were fed a standard CHD, and at 9 weeks, a group of ten mice was transferred to a HFD. At 10 weeks, osmotic minipumps were inserted subcutaneously in mice under ketamine-xylazine anesthesia to deliver NaCl or TMAO (2.78 mM in 0.9% NaCl) for 6 weeks as described previously (Cani et al., 2007).

### Insulin Secretion from Isolated Islets

Six-week-old C57BL/6J male mice ( $n = 20$ ) were euthanized by cervical dislocation and pancreatic islets isolated by collagenase digestion. Groups of 5–6 islets per well (1,705 islets in total) were incubated in presence of TMAO in culture media. Islets were then incubated in 2.8 mM glucose to measure basal insulin production and subsequently in 16.7 mM glucose to measure glucose stimulated insulin secretion.

### ER Stress

ER stress was assessed in 3T3-L1 adipocytes after 7 days of differentiation, upon ER stress stimulation by 50 ng/mL tunicamycin, and rescued by 10 mM PBA or 10 mM TMAO. RNA was extracted from cells, and differential splicing of XBP1 mRNA was assessed by qPCR before reverse transcription using previously described primers for total XBP1 (XBP1t) and spliced XBP1 (XBP1s) (Wang et al., 2011a).

### Lipid Accumulation

Oil red O staining was performed in differentiated 3T3-L1 adipocytes after 9 days of differentiation. Oil red O was added for 10 min. The dye bound to lipids was resuspended using isopropanol, and optical density at 520 nm was read on a spectrophotometer. The oil red O quantification was then normalized to cell viability assessed by crystal violet staining for 30 min, resuspended in methanol, and read at 600 nm.

### Glucose Tolerance and Insulin Secretion Tests

Body weight (BW) was recorded and intraperitoneal glucose tolerance tests (IP-GTT, 2 g/kg BW) were performed in overnight-fasted mice as previously described (Fearnside et al., 2008).

### Behavioral Tests

EPM and OF were used to assess rodent exploration, activity, and anxiety as previously described (Solberg et al., 2006; Valdar et al., 2006). Animals were all naively tested at 8 weeks of age.

### Transcriptomics

Experiments were performed according to Affymetrix protocols as previously described (Toye et al., 2007). Microarray data were analyzed using R and the Bioconductor packages affy (Gautier et al., 2004), LIMMA (linear models for microarray data) (Smyth, 2005), and BiNGO (Maere et al., 2005).

### Metabolic Phenotyping

Urine samples were profiled using a <sup>1</sup>H-NMR spectrometer operating at a 600.22 MHz <sup>1</sup>H frequency, and spectra were imported into MATLAB (R2012b, MathWorks) as described previously (Dumas et al., 2006). The dataset was then further aligned using recursive segment-wise peak alignment (RSPA) (Veselkov et al., 2009), and peak calling was performed using statistical recoupling of variables (SRVs) (Blaise et al., 2009). Variance-stabilizing logarithmic transform of the SRV clusters (Veselkov et al., 2011) and probabilistic quotient normalization (Dieterle et al., 2006) were used before multivariate analyses. Predictive models were built using O-PLS-DA with 7-fold cross-validation. Models were validated by permutations testing of the Q<sup>2</sup><sub>Yhat</sub> goodness-of-prediction statistics parameter with 10,000 random iterations and calculation of an empirical p value (Blaise et al., 2007).

Experiments are Minimum Information About a Microarray Experiment (MI-AME) compliant. See Supplemental Experimental Procedures for more details.

### ACCESSION NUMBERS

The accession number for the full protocols and data reported in this paper is ArrayExpress: E-MTAB-2569.

### SUPPLEMENTAL INFORMATION

Supplemental Information includes Supplemental Experimental Procedures, four figures, and four tables and can be found with this article online at <http://dx.doi.org/10.1016/j.celrep.2017.06.039>.

### AUTHOR CONTRIBUTIONS

Conceptualization, M.-E.D., J.K.N., and D.G.; Investigation, M.-E.D., A.R.R., J.C., S.C., C.H., C.D., R.H.B., T.A., J.F.F., C.B., and N.P.; Analysis, M.-E.D., A.R.R., L.H., Q.G., E.M.N., and C.L.B.; Supervision, M.-E.D., J.K.N., and D.G.; Writing – Original Draft, M.-E.D., A.R.R., and D.G.; Writing – Review

and Editing, M.-E.D., J.K.N., and D.G.; Funding Acquisition, M.-E.D., J.S., J.K.N., and D.G.

### ACKNOWLEDGMENTS

The authors thank J.T.M. Pearce for permutation script and J. Flint and R.M.J. Deacon for advice with the implementation of the behavioral tests. This work was supported by grants from the Wellcome Trust (Functional Genomics Initiative grant Biological Atlas of Insulin Resistance 06678), the European Commission (FGENTCARD LSHG-CT-2006-037683 and METACARDIS HEALTH-F4-2012-305312), and a Wellcome Trust Senior Fellowship in Basic Biomedical Science (057733) to D.G. This work used the computing resources of the UK MEDical BIOinformatics partnership—aggregation, integration, visualization, and analysis of large, complex data (UK MED-BIO), which is supported by the Medical Research Council (MR/L01632X/1). L.H. is in receipt of an MRC Intermediate Research Fellowship in Data Science (MR/L01632X/1, UK MED-BIO). C.L.B. was funded by Nestlé (RDLS015375).

Received: August 14, 2015

Revised: July 21, 2016

Accepted: June 12, 2017

Published: July 5, 2017

### REFERENCES

- Akerfeldt, M.C., Howes, J., Chan, J.Y., Stevens, V.A., Boubenna, N., McGuire, H.M., King, C., Biden, T.J., and Laybutt, D.R. (2008). Cytokine-induced beta-cell death is independent of endoplasmic reticulum stress signaling. *Diabetes* 57, 3034–3044.
- Al-Waiz, M., Ayesh, R., Mitchell, S.C., Idle, J.R., and Smith, R.L. (1987). Disclosure of the metabolic retroversion of trimethylamine *N*-oxide in humans: a pharmacogenetic approach. *Clin. Pharmacol. Ther.* 42, 608–612.
- al-Waiz, M., Mikov, M., Mitchell, S.C., and Smith, R.L. (1992). The exogenous origin of trimethylamine in the mouse. *Metabolism* 41, 135–136.
- Bai, C., Bowers, J., Verkman, A.S.A., and Matthay, M.A.M. (1998). A mouse model to test the in vivo efficacy of chemical chaperones. *J. Pharmacol. Toxicol. Methods* 40, 39–45.
- Basseri, S., Lhoták, S., Sharma, A.M., and Austin, R.C. (2009). The chemical chaperone 4-phenylbutyrate inhibits adipogenesis by modulating the unfolded protein response. *J. Lipid Res.* 50, 2486–2501.
- Bennett, B.J., de Aguiar Vallim, T.Q., Wang, Z., Shih, D.M., Meng, Y., Gregory, J., Allayee, H., Lee, R., Graham, M., Crooke, R., et al. (2013). Trimethylamine-*N*-oxide, a metabolite associated with atherosclerosis, exhibits complex genetic and dietary regulation. *Cell Metab.* 17, 49–60.
- Bercik, P., Denou, E., Collins, J., Jackson, W., Lu, J., Jury, J., Deng, Y., Blennerhassett, P., Macri, J., McCoy, K.D., et al. (2011). The intestinal microbiota affect central levels of brain-derived neurotrophic factor and behavior in mice. *Gastroenterology* 141, 599–609, 609.e1–609.e3.
- Blaise, B.J., Giacomotto, J., Elena, B., Dumas, M.-E., Toulhoat, P., Ségalat, L., and Emsley, L. (2007). Metabotyping of *Caenorhabditis elegans* reveals latent phenotypes. *Proc. Natl. Acad. Sci. USA* 104, 19808–19812.
- Blaise, B.J., Shintu, L., Elena, B., Emsley, L., Dumas, M.-E., and Toulhoat, P. (2009). Statistical recoupling prior to significance testing in nuclear magnetic resonance based metabolomics. *Anal. Chem.* 81, 6242–6251.
- Bravo, J.A., Forsythe, P., Chew, M.V., Escaravage, E., Savignac, H.M., Dinan, T.G., Bienenstock, J., and Cryan, J.F. (2011). Ingestion of *Lactobacillus* strain regulates emotional behavior and central GABA receptor expression in a mouse via the vagus nerve. *Proc. Natl. Acad. Sci. USA* 108, 16050–16055.
- Burcelin, R., Crivelli, V., Dacosta, A., Roy-Tirelli, A., and Thorens, B. (2002). Heterogeneous metabolic adaptation of C57BL/6J mice to high-fat diet. *Am. J. Physiol. Endocrinol. Metab.* 282, E834–E842.
- Cani, P.D., Amar, J., Iglesias, M.A., Poggi, M., Knauf, C., Bastelica, D., Neyrinck, A.M., Fava, F., Tuohy, K.M., Chabo, C., et al. (2007). Metabolic endotoxemia initiates obesity and insulin resistance. *Diabetes* 56, 1761–1772.



- Clayton, T.A., Lindon, J.C., Cloarec, O., Antti, H., Charuel, C., Hanton, G., Provost, J.-P., Le Net, J.-L., Baker, D., Walley, R.J., et al. (2006). Pharmacometabonomic phenotyping and personalized drug treatment. *Nature* **440**, 1073–1077.
- Cotillard, A., Kennedy, S.P., Kong, L.C., Prifti, E., Pons, N., Le Chatelier, E., Almeida, M., Quinquis, B., Levenez, F., Galleron, N., et al.; ANR MicroObes consortium (2013). Dietary intervention impact on gut microbial gene richness. *Nature* **500**, 585–588.
- Craciun, S., and Balskus, E.P. (2012). Microbial conversion of choline to trimethylamine requires a glycol radical enzyme. *Proc. Natl. Acad. Sci. USA* **109**, 21307–21312.
- Dao, M.C., Everard, A., Aron-Wisnewsky, J., Sokolovska, N., Prifti, E., Verger, E.O., Kayser, B.D., Levenez, F., Chilloux, J., Hoyle, L., et al.; MICRO-Obes Consortium (2016). *Akkermansia muciniphila* and improved metabolic health during a dietary intervention in obesity: relationship with gut microbiome richness and ecology. *Gut* **65**, 426–436.
- David, L.A., Maurice, C.F., Carmody, R.N., Gootenberg, D.B., Button, J.E., Wolfe, B.E., Ling, A.V., Devlin, A.S., Varma, Y., Fischbach, M.A., et al. (2014). Diet rapidly and reproducibly alters the human gut microbiome. *Nature* **505**, 559–563.
- Diaz Heijtz, R., Wang, S., Anuar, F., Qian, Y., Björkholm, B., Samuelsson, A., Hibberd, M.L., Forssberg, H., and Pettersson, S. (2011). Normal gut microbiota modulates brain development and behavior. *Proc. Natl. Acad. Sci. USA* **108**, 3047–3052.
- Dieterle, F., Ross, A., Schlotterbeck, G., and Senn, H. (2006). Probabilistic quotient normalization as robust method to account for dilution of complex biological mixtures. Application in <sup>1</sup>H NMR metabolomics. *Anal. Chem.* **78**, 4281–4290.
- Dolphin, C.T., Janmohamed, A., Smith, R.L., Shephard, E.A., and Phillips, I.R. (1997). Missense mutation in flavin-containing mono-oxygenase 3 gene, FMO3, underlies fish-odour syndrome. *Nat. Genet.* **17**, 491–494.
- Dumas, M.-E. (2011). The microbial-mammalian metabolic axis: beyond simple metabolism. *Cell Metab.* **13**, 489–490.
- Dumas, M.-E., Barton, R.H., Toye, A., Cloarec, O., Blancher, C., Rothwell, A., Fearnside, J., Tatoud, R., Blanc, V., Lindon, J.C., et al. (2006). Metabolic profiling reveals a contribution of gut microbiota to fatty liver phenotype in insulin-resistant mice. *Proc. Natl. Acad. Sci. USA* **103**, 12511–12516.
- Dumas, M.-E., Wilder, S.P., Bihoreau, M.-T., Barton, R.H., Fearnside, J.F., Argoud, K., D'Amato, L., Wallis, R.H., Blancher, C., Keun, H.C., et al. (2007). Direct quantitative trait locus mapping of mammalian metabolic phenotypes in diabetic and normoglycemic rat models. *Nat. Genet.* **39**, 666–672.
- Dumas, M.-E., Kinross, J., and Nicholson, J.K. (2014). Metabolic phenotyping and systems biology approaches to understanding metabolic syndrome and fatty liver disease. *Gastroenterology* **146**, 46–62.
- Elliott, P., Poma, J.M., Chan, Q., Garcia-Perez, I., Wijeyesekera, A., Bictash, M., Ebbels, T.M., Ueshima, H., Zhao, L., van Horn, L., et al. (2015). Urinary metabolic signatures of human adiposity. *Sci. Transl. Med.* **7**, 285ra62.
- Fearnside, J.F., Dumas, M.-E., Rothwell, A.R., Wilder, S.P., Cloarec, O., Toye, A., Blancher, C., Holmes, E., Tatoud, R., Barton, R.H., et al. (2008). Phylometabonomic patterns of adaptation to high fat diet feeding in inbred mice. *PLoS ONE* **3**, e1668.
- Gao, X., Liu, X., Xu, J., Xue, C., Xue, Y., and Wang, Y. (2014). Dietary trimethylamine *N*-oxide exacerbates impaired glucose tolerance in mice fed a high fat diet. *J. Biosci. Bioeng.* **118**, 476–481.
- Gautier, L., Cope, L., Bolstad, B.M., and Irizarry, R.A. (2004). affy—analysis of Affymetrix GeneChip data at the probe level. *Bioinformatics* **20**, 307–315.
- Gavaghan, C.L., Holmes, E., Lenz, E., Wilson, I.D., and Nicholson, J.K. (2000). An NMR-based metabolomic approach to investigate the biochemical consequences of genetic strain differences: application to the C57BL/10J and Alpk:ApfCD mouse. *FEBS Lett.* **484**, 169–174.
- Gregor, M.F., Misch, E.S., Yang, L., Hummasti, S., Inouye, K.E., Lee, A.-H., Bieri, B., and Hotamisligil, G.S. (2013). The role of adipocyte XBP1 in metabolic regulation during lactation. *Cell Rep.* **3**, 1430–1439.
- Hotamisligil, G.S. (2010). Endoplasmic reticulum stress and the inflammatory basis of metabolic disease. *Cell* **140**, 900–917.
- Hsiao, E.Y., McBride, S.W., Hsien, S., Sharon, G., Hyde, E.R., McCue, T., Co-delli, J.A., Chow, J., Reisman, S.E., Petrosino, J.F., et al. (2013). Microbiota modulate behavioral and physiological abnormalities associated with neurodevelopmental disorders. *Cell* **155**, 1451–1463.
- Karlsson, F.H., Tremaroli, V., Nookaew, I., Bergström, G., Behre, C.J., Fagerberg, B., Nielsen, J., and Bäckhed, F. (2013). Gut metagenome in European women with normal, impaired and diabetic glucose control. *Nature* **498**, 99–103.
- Koeth, R.A., Wang, Z., Levison, B.S., Buffa, J.A., Org, E., Sheehy, B.T., Britt, E.B., Fu, X., Wu, Y., Li, L., et al. (2013). Intestinal microbiota metabolism of L-carnitine, a nutrient in red meat, promotes atherosclerosis. *Nat. Med.* **19**, 576–585.
- Koeth, R.A., Levison, B.S., Culley, M.K., Buffa, J.A., Wang, Z., Gregory, J.C., Org, E., Wu, Y., Li, L., Smith, J.D., et al. (2014).  $\gamma$ -Butyrobetaine is a proatherogenic intermediate in gut microbial metabolism of L-carnitine to TMAO. *Cell Metab.* **20**, 799–812.
- Le Chatelier, E., Nielsen, T., Qin, J., Prifti, E., Hildebrand, F., Falony, G., Almeida, M., Arumugam, M., Batto, J.-M., Kennedy, S., et al.; MetaHIT consortium (2013). Richness of human gut microbiome correlates with metabolic markers. *Nature* **500**, 541–546.
- Lehner, B. (2013). Genotype to phenotype: lessons from model organisms for human genetics. *Nat. Rev. Genet.* **14**, 168–178.
- Lever, M., George, P.M., Slow, S., Bellamy, D., Young, J.M., Ho, M., McEntyre, C.J., Elmslie, J.L., Atkinson, W., Molyneux, S.L., et al. (2014). Betaine and trimethylamine-*N*-oxide as predictors of cardiovascular outcomes show different patterns in diabetes mellitus: an observational study. *PLoS ONE* **9**, e114969.
- Li, J., Jia, H., Cai, X., Zhong, H., Feng, Q., Sunagawa, S., Arumugam, M., Kultima, J.R., Prifti, E., Nielsen, T., et al.; MetaHIT Consortium (2014). An integrated catalog of reference genes in the human gut microbiome. *Nat. Biotechnol.* **32**, 834–841.
- Ma, J., Pazos, I.M., and Gai, F. (2014). Microscopic insights into the protein-stabilizing effect of trimethylamine *N*-oxide (TMAO). *Proc. Natl. Acad. Sci. USA* **111**, 8476–8481.
- Maere, S., Heymans, K., and Kuiper, M. (2005). BiNGO: a Cytoscape plugin to assess overrepresentation of gene ontology categories in biological networks. *Bioinformatics* **21**, 3448–3449.
- McEntyre, C.J., Lever, M., Chambers, S.T., George, P.M., Slow, S., Elmslie, J.L., Florkowski, C.M., Lunt, H., and Krebs, J.D. (2015). Variation of betaine, *N,N*-dimethylglycine, choline, glycerophosphorylcholine, taurine and trimethylamine-*N*-oxide in the plasma and urine of overweight people with type 2 diabetes over a two-year period. *Ann. Clin. Biochem.* **52**, 352–360.
- Miao, J., Ling, A.V., Manthena, P.V., Gearing, M.E., Graham, M.J., Crooke, R.M., Croce, K.J., Esquejo, R.M., Clish, C.B., Vicent, D., and Biddinger, S.B.; Morbid Obesity Study Group (2015). Flavin-containing monooxygenase 3 as a potential player in diabetes-associated atherosclerosis. *Nat. Commun.* **6**, 6498.
- Muegge, B.D., Kuczynski, J., Knights, D., Clemente, J.C., González, A., Fontana, L., Henriksen, B., Knight, R., and Gordon, J.I. (2011). Diet drives convergence in gut microbiome functions across mammalian phylogeny and within humans. *Science* **332**, 970–974.
- Nicholson, J.K., Holmes, E., Kinross, J., Burcelin, R., Gibson, G., Jia, W., and Pettersson, S. (2012). Host-gut microbiota metabolic interactions. *Science* **336**, 1262–1267.
- Ozcan, U., Yilmaz, E., Ozcan, L., Furuhashi, M., Vaillancourt, E., Smith, R.O., Görgün, C.Z., and Hotamisligil, G.S. (2006). Chemical chaperones reduce ER stress and restore glucose homeostasis in a mouse model of type 2 diabetes. *Science* **313**, 1137–1140.
- Plovier, H., Everard, A., Druart, C., Depommier, C., Van Hul, M., Geurts, L., Chilloux, J., Ottman, N., Duparc, T., Lichtenstein, L., et al. (2017). A purified



- membrane protein from *Akkermansia muciniphila* or the pasteurized bacterium improves metabolism in obese and diabetic mice. *Nat. Med.* **23**, 107–113.
- Qin, J., Li, Y., Cai, Z., Li, S., Zhu, J., Zhang, F., Liang, S., Zhang, W., Guan, Y., Shen, D., et al. (2012). A metagenome-wide association study of gut microbiota in type 2 diabetes. *Nature* **490**, 55–60.
- Ridaura, V.K., Faith, J.J., Rey, F.E., Cheng, J., Duncan, A.E., Kau, A.L., Griffin, N.W., Lombard, V., Henrissat, B., Bain, J.R., et al. (2013). Gut microbiota from twins discordant for obesity modulate metabolism in mice. *Science* **341**, 1241214.
- Russell, W.R., Hoyles, L., Flint, H.J., and Dumas, M.-E. (2013). Colonic bacterial metabolites and human health. *Curr. Opin. Microbiol.* **16**, 246–254.
- Serino, M., Luche, E., Gres, S., Baylac, A., Bergé, M., Cenac, C., Waget, A., Klopp, P., Iacovoni, J., Klopp, C., et al. (2012). Metabolic adaptation to a high-fat diet is associated with a change in the gut microbiota. *Gut* **61**, 543–553.
- Sha, H., He, Y., Chen, H., Wang, C., Zenno, A., Shi, H., Yang, X., Zhang, X., and Qi, L. (2009). The IRE1 $\alpha$ -XBP1 pathway of the unfolded protein response is required for adipogenesis. *Cell Metab.* **9**, 556–564.
- Shoaie, S., Ghaffari, P., Kovatcheva-Datchary, P., Mardinoglu, A., Sen, P., Pujos-Guillot, E., de Wouters, T., Juste, C., Rizkalla, S., Chilloux, J., et al.; MICRO-Obes Consortium (2015). Quantifying diet-induced metabolic changes of the human gut microbiome. *Cell Metab.* **22**, 320–331.
- Smith, M.I., Yatsunenko, T., Manary, M.J., Trehan, I., Mkakosya, R., Cheng, J., Kau, A.L., Rich, S.S., Concannon, P., Mychaleckyj, J.C., et al. (2013). Gut microbiomes of Malawian twin pairs discordant for kwashiorkor. *Science* **339**, 548–554.
- Smyth, G.K. (2005). limma: linear models for microarray data. In *Bioinformatics and Computational Biology Solutions Using R and Bioconductor*, R. Gentleman, V.J. Carey, W. Huber, R.A. Irizarry, and S. Dudoit, eds. (Springer-Verlag), pp. 397–420.
- Solberg, L.C., Valdar, W., Gauguier, D., Nunez, G., Taylor, A., Burnett, S., Arboledas-Hita, C., Hernandez-Pliego, P., Davidson, S., Burns, P., et al. (2006). A protocol for high-throughput phenotyping, suitable for quantitative trait analysis in mice. *Mamm. Genome* **17**, 129–146.
- Tang, W.H.W., Wang, Z., Levison, B.S., Koeth, R.A., Britt, E.B., Fu, X., Wu, Y., and Hazen, S.L. (2013). Intestinal microbial metabolism of phosphatidylcholine and cardiovascular risk. *N. Engl. J. Med.* **368**, 1575–1584.
- Toye, A.A., Dumas, M.E., Blancher, C., Rothwell, A.R., Fearnside, J.F., Wilder, S.P., Bihoreau, M.T., Cloarec, O., Azzouzi, I., Young, S., et al. (2007). Subtle metabolic and liver gene transcriptional changes underlie diet-induced fatty liver susceptibility in insulin-resistant mice. *Diabetologia* **50**, 1867–1879.
- Turnbaugh, P.J., Ley, R.E., Mahowald, M.A., Magrini, V., Mardis, E.R., and Gordon, J.I. (2006). An obesity-associated gut microbiome with increased capacity for energy harvest. *Nature* **444**, 1027–1031.
- Ussher, J.R., Lopaschuk, G.D., and Arduini, A. (2013). Gut microbiota metabolism of L-carnitine and cardiovascular risk. *Atherosclerosis* **231**, 456–461.
- Valdar, W., Solberg, L.C., Gauguier, D., Cookson, W.O., Rawlins, J.N.P., Mott, R., and Flint, J. (2006). Genetic and environmental effects on complex traits in mice. *Genetics* **174**, 959–984.
- van Schadewijk, A., van't Wout, E.F.A., Stolk, J., and Hiemstra, P.S. (2012). A quantitative method for detection of spliced X-box binding protein-1 (XBP1) mRNA as a measure of endoplasmic reticulum (ER) stress. *Cell Stress Chaperones* **17**, 275–279.
- Venkatesh, M., Mukherjee, S., Wang, H., Li, H., Sun, K., Benechet, A.P., Qiu, Z., Maher, L., Redinbo, M.R., Phillips, R.S., et al. (2014). Symbiotic bacterial metabolites regulate gastrointestinal barrier function via the xenobiotic sensor PXR and Toll-like receptor 4. *Immunity* **41**, 296–310.
- Veselkov, K.A., Lindon, J.C., Ebbels, T.M.D., Crockford, D., Volynkin, V.V., Holmes, E., Davies, D.B., and Nicholson, J.K. (2009). Recursive segment-wise peak alignment of biological (<sup>1</sup>H) NMR spectra for improved metabolic biomarker recovery. *Anal. Chem.* **81**, 56–66.
- Veselkov, K.A., Vingara, L.K., Masson, P., Robinette, S.L., Want, E., Li, J.V., Barton, R.H., Boursier-Neyret, C., Waither, B., Ebbels, T.M., et al. (2011). Optimized preprocessing of ultra-performance liquid chromatography/mass spectrometry urinary metabolic profiles for improved information recovery. *Anal. Chem.* **83**, 5864–5872.
- Wang, F.-M., Chen, Y.-J., and Ouyang, H.-J. (2011a). Regulation of unfolded protein response modulator XBP1s by acetylation and deacetylation. *Biochem. J.* **433**, 245–252.
- Wang, Z., Klipfell, E., Bennett, B.J., Koeth, R., Levison, B.S., Dugar, B., Feldstein, A.E., Britt, E.B., Fu, X., Chung, Y.-M., et al. (2011b). Gut flora metabolism of phosphatidylcholine promotes cardiovascular disease. *Nature* **472**, 57–63.
- Warrier, M., Shih, D.M., Burrows, A.C., Ferguson, D., Gromovsky, A.D., Brown, A.L., Marshall, S., McDaniel, A., Schugar, R.C., Wang, Z., et al. (2015). The generating enzyme flavin monooxygenase 3 is a central regulator of cholesterol balance. *Cell Rep.* **10**, 326–338.
- Yancey, P.H., Clark, M.E., Hand, S.C., Bowlus, R.D., and Somero, G.N. (1982). Living with water stress: evolution of osmolyte systems. *Science* **217**, 1214–1222.
- Yoshimoto, S., Loo, T.M., Atarashi, K., Kanda, H., Sato, S., Oyadomari, S., Iwakura, Y., Oshima, K., Morita, H., Hattori, M., et al. (2013). Obesity-induced gut microbial metabolite promotes liver cancer through senescence secretome. *Nature* **499**, 97–101.

**Supplemental Information**

**Microbial-Host Co-metabolites Are Prodromal  
Markers Predicting Phenotypic Heterogeneity in  
Behavior, Obesity, and Impaired Glucose Tolerance**

**Marc-Emmanuel Dumas, Alice R. Rothwell, Lesley Hoyles, Thomas Aranias, Julien Chilloux, Sophie Calderari, Elisa M. Noll, Noémie Péan, Claire L. Boulangé, Christine Blancher, Richard H. Barton, Quan Gu, Jane F. Fearnside, Chloé Deshayes, Christophe Hue, James Scott, Jeremy K. Nicholson, and Dominique Gauguier**

## SUPPLEMENTAL EXPERIMENTAL PROCEDURES

**Animals.** Male C57BL/6J mice were bred in the laboratory. All mice were kept under standard maintenance conditions on 12 h light/dark cycle.

**Heterogeneous mouse populations.** Mice were weaned at 21 days and caged in groups of 10 throughout the entire experiments. They were fed a normal carbohydrate (CHD) diet containing 5 % fat, 19 % protein and 3.5 % fibre (S&K Universal Ltd, Hull, UK). At five weeks, a group of 50 mice was transferred to a 40 %w/w (65%Kcal) high fat diet (HFD) containing 32 % pig fat, 8 % casein fat, 19 % protein, 21 % glucose (Special Diet Services, Amersham, UK) *ad libitum*. A group of 50 age-matched mice remained on CHD throughout the experiment. All experiments were carried out under licences granted by the UK Home Office and approved by the ethical committee of the University of Oxford.

**TMAO infusion.** Six-week old C57BL/6J mice purchased from a commercial supplier (Charles River, L'Arbresle, France) were maintained in specific pathogen-free (SPF) conditions. Mice were fed a standard chow diet and at nine weeks, a group of 10 mice was transferred to a HFD (respectively D12450Ki and D12492i, Research diets, New Brunswick, NJ), as below.

| General Composition | HFD (40%w/w, 65%Kcal) | CHD (5% w/w) |
|---------------------|-----------------------|--------------|
| Crude oil           | 38.96                 | 4.73         |
| Crude protein       | 20.28                 | 18.68        |
| Crude fiber         | 3.5                   | 3.48         |
| Ash                 | 2.88                  | 5.38         |
| NFE                 | 23.86                 | 59.73        |

At ten weeks, mice were anaesthetised by injection of ketamine-xylazine (Centravet, Plancoet, France) for subcutaneous implantation of osmotic minipumps (Alzet® 2006, Charles River Lab France, L'Arbresle, France) to deliver either NaCl or TMAO for a period to 6 weeks, as described previously (Cani et al., 2007). Minipumps were originally primed according to the manufacturer's instructions and filled with solutions of either 0.9% NaCl or 2.78 mM TMAO in 0.9% NaCl. Fed blood glucose and BW were measured every week. After five weeks of NaCl or TMAO treatment, an intra-peritoneal glucose tolerance and insulin secretion test (2g glucose/kg BW) was performed in conscious mice. Blood glucose was determined with an Accu-Chek® Performa (Roche Diagnostics, Meylan, France). Paralleled blood samples were taken to determine plasma concentration of insulin using an ELISA kit (Mercodia, Uppsala, Sweden).

**Insulin secretion from isolated pancreatic islets.** Six-week old C57BL/6J male mice (n=20) purchased from a commercial supplier (Charles River, L'Arbresle, France) were euthanized by cervical dislocation and pancreatic islets isolated by collagenase digestion (Boehringer Mannheim, Mannheim, Germany). Groups of 5-6 islets (1705 islets in total) per well were incubated in presence of TMAO in a culture medium consisting of RPMI 1640, 11

mM glucose, 100 units/mL penicillin, 100 µg/mL streptomycin, 40 µg/mL gentamycin and 10% FCS. Islets were then incubated in 2.8 mM glucose to measure basal insulin production and subsequently in 16.7 mM glucose to measure glucose stimulated insulin secretion. A total of 6 independent experiments were carried out.

**Glucose tolerance and insulin secretion tests.** Body weight (BW) was recorded and intraperitoneal glucose tolerance tests (IP-GTT, 2 g/kg BW) were performed in overnight-fasted mice as previously described (Fearnside et al., 2008). Blood samples were collected from the tip of the tail vein before the injection and 15, 30 and 75 min afterward. Blood glucose concentration was determined immediately. Cumulative glycemia (CumG) was calculated as the increment of plasma glucose values during the test. Plasma samples were separated by centrifugation and stored at -80 °C until insulin assay. CumG and cumulative insulinemia (CumIRI) were calculated as the increment of the values of plasma glucose and insulin, respectively, during the test. Data from the IP-GTT was used to determine the homeostasis model assessment of insulin resistance (HOMA).

**Biofluid collection and tissue sampling.** Blood and urine samples were collected in mice of the CHD and HFD groups at 5 weeks of age (before the HFD induction for the HFD group) and at 2 and 5 months of age (before the IP-GTT). BW and body length (BL) were determined and body mass index (BMI) was calculated as the ratio  $BW/BL^2$ . Mice were housed individually in metabolic cages (Techniplast, Italy) for a 48-h period before the sampling. Animals were then killed by CO<sub>2</sub> asphyxiation. Brown adipose tissue and retroperitoneal and epididymal fat pads (RFP and EPD, respectively) were collected, weighed and snap-frozen in liquid nitrogen. Adiposity index (AI) was calculated as the ratio between RFP or EPD weight to BW (AI\_RFP and AI\_EPD, respectively).

**Clinical biochemistry.** Blood glucose levels were determined with a glucose meter (Accucheck, Roche Diagnostics). Plasma immunoreactive insulin (IRI) was determined with an ELISA kit (Mercodia, Uppsala, Sweden). Plasma concentrations of triglycerides and total, HDL and LDL cholesterol were determined using diagnostic enzymatic/colorimetric kits (ABX, Shefford, UK) on a Cobas Mira Plus automatic analyser (ABX, Shefford, UK).

**Behavioural Tests.** Elevated Plus Maze (EPM) and Open Field (OF) were used to assess rodent exploration, activity and anxiety as previously described (Solberg et al., 2006; Valdar et al., 2006). Animals were all naïvely tested at 8 weeks of age.

*EPM.* The EPM platform was 1 m above floor level, with a grey-coloured surface at least 1 m radius of free space around the maze, illuminated from an overhead source (1 m above the platform with an aluminium shade) at 100 Lux intensity. All tests were 5 min in duration. All mice were first placed in the centre, facing the same open arm. Activity was scored as the number of entries into either the closed or open arms as well as number of entries into the centre (total entries). Anxiety was measured as relative time spent in each of the compartments.

*Open field (OF)*. OF tests were performed in a clear rectangular plastic four-walled container (54.5 cm x 32.5 cm) set in the middle of the floor in the same room used for the EPM tests. White grid lines were marked (producing squares 11 cm x 11 cm) on a black sheet of cardboard, which was laid under the box. Each trial lasted for 3 min. Activity was measured by the number of transitions into different squares. The number of rearings was also recorded to quantify activity. The grid divided the area into outer or inner squares. Mice were always placed in the same middle outer square on one of the ends of the rectangle, and time taken to enter the 'inner' arena was recorded as 'the latency to enter the centre'. Relative time spent in these inner and outer compartments was also calculated.

### **Cell-Based Assays.**

**Insulin secretion in isolated islets.** Insulin secreted in cell medium was measured using an ELISA kit (Mercodia, Uppsala, Sweden).

**Adipocyte differentiation.** 3T3-L1 fibroblasts cells (ATCC, Molsheim, France) were routinely cultured in DMEM high glucose (Invitrogen, St Aubin, France) containing 10 % Calf Serum (Life Technology, St Aubin, France) at 37 °C, 5 % CO<sub>2</sub>. To initiate adipocyte differentiation, 3T3-L1 fibroblasts were plated in P24 dishes (Becton Dickinson, Courtaboeuf, France) at a density of 10<sup>4</sup> cells/dish. At this density, cells reached confluence 5 days later and then the medium was replaced. After 48h (day 0), adipocyte differentiation was induced by changing the medium to DMEM high glucose containing 10% fetal bovine serum (PAA, Les Mureaux, France), 0.5 mM IBMX (Sigma Aldrich, St Quentin, France), 0.25 µM dexamethasone (Sigma Aldrich, St Quentin, France) and 0.4 µM insulin (Sigma Aldrich, St Quentin, France). After 72 h (day 3), the medium was changed to DMEM high glucose containing 10% FBS, and 0.4 µM insulin. After 48 h (day 5), the medium was changed as at D3. At D7, adipocytes were maintained in DMEM high glucose with 5 % FBS and refreshed every 2 days.

**Metabolite supplementation.** TMAO (Sigma Aldrich, St Quentin, France) was added either during the differentiation or at the end of adipocyte differentiation. Three concentrations of the metabolite (1 M, 10 mM and 0.1 mM, diluted in water) were tested in quadruplet. To test the impact of metabolite supplementation during adipocyte differentiation, metabolites were added at day 0, 3 and 5.

**Endoplasmic Reticulum (ER) stress assay.** ER stress was assessed in 3T3-L1 cells after 7 days of differentiation, upon ER stress stimulation by 50 ng/mL tunicamycin and rescued by 10 mM 4-phenylbutyrate or 10 mM TMAO (Sigma Aldrich, Gillingham, UK). RNA was extracted from cells using RNeasy Mini Kit (Qiagen, Manchester, UK). Reverse transcription was performed on 500ng RNA using SuperScript II Reverse Transcriptase (Invitrogen) following provided instructions. Differential splicing of XBP1 mRNA was quantified by quantitative PCR (qPCR) on a StepOnePlus system using SYBR Select Master Mix (Life Technologies, Paisley, UK) and previously described primers for total XBP1 (XBP1t) and spliced XBP1 (XBP1s) as follows (Wang et al., 2011): XBP1t fw: 5'-AAGAACACGCTTGGAATGG-3', XBP1t rv: 5'-ACTCCCCTTGGCCTCCAC-3', XBP1s fw:



5'-GAGTCCGCAGCAGGTG-3' and XBP1s rv: 5'-GTGTCAGAGTCCATGGGA-3'. Results are presented as the ratio of XBP1s to XBP1t expression determined by the relative quantification method (change in cycle threshold).

**Lipid uptake assay.** Oil Red-O staining was performed at day 7. Oil Red-O stock solution was prepared by stirring 0.35 % Oil Red-O (Sigma Aldrich, St Quentin, France) in isopropanol overnight followed by filtration (0.2  $\mu\text{m}$ ). Oil Red O working solution was prepared by mixing stock solution with distilled water (6:4), followed by incubation for 10 min at room temperature. Cells were incubated 5 min with 500  $\mu\text{L}$  10 % formaldehyde (Sigma Aldrich, St Quentin, France) and fixed with 500  $\mu\text{L}$  10 % formaldehyde at least 1 h at room temperature. Subsequently, the cells were washed once with 60 % isopropanol and dried. Oil Red-O working solution (200  $\mu\text{L}$ /dish P24) was added for 10 min. Dishes were then washed four times with distilled water before analysis. After microscopic photography by light transmission, the oil-red-O dye bound to lipids was suspended using isopropanol, and quantifications were obtained by reading the optical density at 500 nm on a spectrophotometer (Biotek).

**Glucose uptake assay.** Glucose uptake in differentiating adipocytes was carried out to test the impact of metabolite supplementation on adipocyte function. After 4h in DMEM high glucose without FBS (Life Technology, St Aubin, France), adipocytes were incubated for 20 min with insulin (100nM) and then 20 min with 0.5 microCi 2<sup>3</sup>H}DeoxyD-Glucose. Cells were then collected in NaOH 300 mM and the incorporated radioactivity was measured.

**Gene transcription profiling.** Total RNA from liver of six mice per group was extracted using Trizol reagent (Invitrogen Life Technologies, Paisley, UK) and cleaned with RNeasy columns (Qiagen Ltd., Crawley, UK). RNA concentrations and integrity were assessed using an Agilent 2100 Bioanalyser (Agilent Technologies, Waldbronn, Germany). RNA probes were hybridized to Affymetrix arrays U430 2.0 (Affymetrix UK Ltd, High Wycombe, UK) containing 45,266 probesets, respectively, and allowing quantification of the abundance of transcripts corresponding to 20,827 independent gene and EST sequences. Experiments were performed according to Affymetrix protocols as previously described (Toye et al., 2007). Experiments are MIAME compliant and full protocols and data are publicly available ([www.ebi.ac.uk/arrayexpress/](http://www.ebi.ac.uk/arrayexpress/)) under the accession E-MTAB-2569.

**<sup>1</sup>H NMR Spectroscopy.** Mouse urine samples were prepared by using 200  $\mu\text{L}$  of urine mixed with 200  $\mu\text{L}$  of water and 200  $\mu\text{L}$  of 0.1 M phosphate buffer solution (10 % <sup>2</sup>H<sub>2</sub>O/H<sub>2</sub>O vol/vol, with 0.05 % sodium 3-trimethylsilyl-(2,2,3,3-<sup>2</sup>H<sub>4</sub>)-1-propionate for chemical shift reference at  $\delta$ -0.0) in 96-well plates for high-throughput flow-injection NMR acquisition. Standard <sup>1</sup>H NMR spectra were measured on a spectrometer (Bruker, Rheinstetten, Germany) operating at 600.22 MHz <sup>1</sup>H frequency, as described previously described (Dumas et al., 2006). Structural assignment was achieved using <sup>1</sup>H-<sup>13</sup>C Heteronuclear Single Quantum Coherence (HSQC) and <sup>1</sup>H-<sup>1</sup>H Correlation Spectroscopy (COSY) NMR spectroscopy, as well as in-house and publicly available standard assignment databases.

**Univariate testing.** Univariate General Linear Model (GLM) was performed for phenotype analyses using the SPSS statistical package (version 12.0). To assess differences between mouse groups, Fisher's LSD and Tamhane's T2 post hoc tests were used according to Levene's test for equality of variance. The test for homogeneity of variance was used to determine whether groups had significantly different measures of variability for various parameters.

**Multivariate Statistical Analysis of <sup>1</sup>H NMR metabolic profiles.** The <sup>1</sup>H NMR spectra were phased, calibrated and baseline-corrected before being imported into Matlab (R2012b, Mathworks, Natick, MA) at high resolution. The regions δ-6.0–5.5 and δ-5.0–4.5 were removed to eliminate baseline effects of imperfect water signal pre-saturation. The dataset was pre-normalized using row-profile normalization to maintain the internal correlation structure of the dataset. The dataset was then further aligned using RSPA (Veselkov et al., 2009), objective peak identification was performed using statistical recoupling of variables (SRV) (Blaise et al., 2009). Finally, variance-stabilizing logarithmic transform of the SRV clusters (Veselkov et al., 2011) and probabilistic quotient normalization (Dieterle et al., 2006) were used in order to optimize predictive modeling of quantitative physiological variables. Outlier detection was achieved by Principal Component Analysis (PCA). Predictive models were built using Orthogonal Partial Least Squares Discriminant Analysis (O-PLS-DA) (Cloarec et al., 2005), using 7-fold cross-validation (Fonville et al., 2010). Optimal multivariate models were further validated by resampling 10,000 times under the null hypothesis (i.e. generating models with a randomly permuted **Y** not related to the disease outcome). The  $Q^2_{\text{Yhat}}$  goodness-of-prediction statistics of the target model was tested for membership to the population of 10,000 random  $Q^2_{\text{Yhat}}$  values from the null models and an empirical p-value was derived (Blaise et al., 2007). The metabolic biomarkers predictive of disease outcome were further investigated using analysis of variance (AOV) and *p*-values were adjusted using a subsequent Benjamini and Hochberg multiple testing correction.

**Statistical analysis of EPD transcriptome.** Quality control checks were performed to confirm the integrity of the microarray data using simpleaffy (<http://bioinformatics.picr.man.ac.uk/simpleaffy/>). Microarray data were analyzed using R and the BioConductor packages LIMMA (Linear Models for Microarray Data) (Smyth, 2005) and affy (Gautier et al., 2004). Data were background-corrected using rma and normalized using loess. Annotations of genes associated with probes on the microarrays were updated using information from the library mouse4302.db (updated on 12 August 2013). Log<sub>2</sub> scale expression data for 16 animals (*n* = 4 in each group of animals: *L-IGT*, *Mid*, *LNG* and *Ob-IGT*) were correlated against TMAO concentration data using Spearman (corrected for ties). Permutation testing (1,000 replications) was performed for each correlation test to confirm the validity of the significant (*p*<0.05) correlations. Occurrence of significantly correlated genes in

various KEGG pathways was determined. The significance of the over-representation of gene ontology (GO) terms in the list of significantly correlated genes was determined using BiNGO (Maere et al., 2005), returning Cytoscape graphs. An over-representation analysis was done with TMAO-correlated genes and the GO category 'Biological Process'. Only significant ( $P < 0.05$ , after correction for multiple testing using the Benjamini–Hochberg procedure) nodes containing TMAO-correlated genes were retained (*Table S4D*). No annotations were retained for the following entries: 1700011B04RIK, S100A3, D10ERTD447E, KLRA17, 5330422M15RIK, D2ERTD105E, AI854703, 4930505O19RIK, CD52, DNAJB12, CD53, TPD52, 1810013D10RIK, A130094D17RIK, 6430537K16RIK, DXERTD223E, B130034C11RIK, BC065403, FYB, E130119H09RIK, 3100002H20RIK, AU014972, PSMD7, LAIR1, 4931402G19RIK, ANKRA2, 1700058M13RIK, AI463170, 2310045N14RIK, 4930413F20RIK, 5430416O09RIK, 5330423I11RIK, 5830468K08RIK, TNFRSF22, GM15472, GM11827, C77673, 4921517O11RIK, D18ERTD232E, KEG1, TPM3, 5230401M06RIK, 6030458E02RIK, COL9A2, PLEKHO1, 4831407H17RIK, 2810013P06RIK, TCIRG1, MS4A4B, C80993, 4933406K04RIK, 4933433F19RIK, GM20081, GM20083, 7630403G23RIK, GM19835, C030013C21RIK, C030014L02, 8030447M02RIK, D830026I12RIK, TMEM43, GM19544.

Abbreviations: BW\_5wk, body weight at 5 weeks (baseline, ie before diet switch); BW\_2m, body weight at 2 months (after 3 weeks of HFD); BMI\_2m, body mass index at 2 months; FG\_2m, fasting glycemia at 2 months; T15\_2m, glycemia 15 minutes after glucose injection during the IP-GTT at 2 months; T30\_2m, glycemia 30 minutes after glucose injection during the IP-GTT at 2 months; T75\_2m, glycemia 75 minutes after glucose injection during the IP-GTT at 2 months; CG\_2m, cumulative glycemia during IP-GTT at 2 months; dG\_2m, cumulative glycemia over baseline during IP-GTT at 2 months; K15to30\_2m, glucose clearance parameter between 15 and 30 minutes during IP-GTT at 2 months; FI\_2m, fasting insulinemia at 2 months; I15\_2m, plasma insulin 15 minutes after glucose injection during IP-GTT at 2 months; I30\_2m, plasma insulin 30 minutes after glucose injection during IP-GTT at 2 months; I75\_2m, plasma insulin 75 minutes after glucose injection during IP-GTT at 2 months; CI\_2m, cumulative insulinemia (AUC) during IP-GTT at 2 months; IcumG\_2m, ratio between cumulative insulinemia and cumulative glycemia during IP-GTT at 2 months; dl\_2m, cumulative insulinemia over baseline during IP-GTT at 2 months; K15to75ins\_2m, insulin clearance rate during the IP-GTT at 2 months; EPD\_wt, epididymal fat pad weight at 2 months; RFP\_wt, retroperitoneal fat pad weight at 2 months; BAT\_wt, brown adipose tissue weight at 2 months; heart\_wt: heart weight at 2 months; EPD\_ratio, epididymal fat pad weight normalized to body weight at 2 months; RFP\_ratio, retroperitoneal fat pad weight normalized to body weight at 2 months; BAT\_ratio, brown adipose tissue weight normalized to body weight at 2 months; heart\_ratio, heart weight normalized to body weight at 2 months; food.calc\_2m, food consumption calculated at 2 months; ent%.op\_2m, number of entries in the open arm at 2 months; t(c) \_2m, time to enter open arm at 2 months; dig.energy\_2m,

digestible energy calculated at 2 months; rearings.OF\_2m, number of rearings in open field test at 2 months; %wtgain5to8w: body weight gain during 3 weeks of HFD from baseline at 5 weeks to 8 weeks (2 months); BCAAs, branched chain amino acids; AKIV, alpha-ketoisovalerate; BAIB, beta-aminoisobutyrate; AKG, 2-oxogutarate; DMG, *N-N*-dimethylglycine.

## Supplemental References

- Blaise, B.J., Giacomotto, J., Elena, B., Dumas, M.-E., Toulhoat, P., Ségalat, L., Emsley, L., 2007. Metabotyping of *Caenorhabditis elegans* reveals latent phenotypes. *Proc. Natl. Acad. Sci. U.S.A.* 104, 19808–19812.
- Blaise, B.J., Shintu, L., Elena, B., Emsley, L., Dumas, M.-E., Toulhoat, P., 2009. Statistical recoupling prior to significance testing in nuclear magnetic resonance based metabonomics. *Anal Chem* 81, 6242–6251.
- Cani, P.D., Amar, J., Iglesias, M.A., Poggi, M., Knauf, C., Bastelica, D., Neyrinck, A.M., Fava, F., Tuohy, K.M., Chabo, C., Waget, A., Delmée, E., Cousin, B., Sulpice, T., Chamontin, B., Ferrières, J., Tanti, J.-F., Gibson, G.R., Casteilla, L., Delzenne, N.M., Alessi, M.C., Burcelin, R., 2007. Metabolic endotoxemia initiates obesity and insulin resistance. *Diabetes* 56, 1761–1772.
- Cloarec, O., Dumas, M.E., Trygg, J., Craig, A., Barton, R.H., Lindon, J.C., Nicholson, J.K., Holmes, E., 2005. Evaluation of the orthogonal projection on latent structure model limitations caused by chemical shift variability and improved visualization of biomarker changes in  $^1\text{H}$  NMR spectroscopic metabonomic studies. *Anal Chem* 77, 517–526.
- Dieterle, F., Ross, A., Schlotterbeck, G., Senn, H., 2006. Probabilistic quotient normalization as robust method to account for dilution of complex biological mixtures. Application in  $^1\text{H}$  NMR metabonomics. *Anal Chem* 78, 4281–4290.
- Dumas, M.-E., Barton, R.H., Toye, A., Cloarec, O., Blancher, C., Rothwell, A., Fearnside, J., Tatoud, R., Blanc, V., Lindon, J.C., Mitchell, S.C., Holmes, E., McCarthy, M.I., Scott, J., Gauguier, D., Nicholson, J.K., 2006. Metabolic profiling reveals a contribution of gut microbiota to fatty liver phenotype in insulin-resistant mice. *Proc. Natl. Acad. Sci. U.S.A.* 103, 12511–12516.
- Fearnside, J.F., Dumas, M.-E., Rothwell, A.R., Wilder, S.P., Cloarec, O., Toye, A., Blancher, C., Holmes, E., Tatoud, R., Barton, R.H., Scott, J., Nicholson, J.K., Gauguier, D., 2008. Phylometabonomic patterns of adaptation to high fat diet feeding in inbred mice. *PLoS ONE* 3, e1668.
- Fonville, J.M., Richards, S.E., Barton, R.H., Boulange, C.L., Ebbels, T.M.D., Nicholson, J.K., Holmes, E., Dumas, M.-E., 2010. The evolution of partial least squares models and related chemometric approaches in metabonomics and metabolic phenotyping. *J Chemometr* 24, 636–649.
- Gautier, L., Cope, L., Bolstad, B.M., Irizarry, R.A., 2004. affy--analysis of Affymetrix GeneChip data at the probe level. *Bioinformatics* 20, 307–315.
- Maere, S., Heymans, K., Kuiper, M., 2005. BiNGO: a Cytoscape plugin to assess overrepresentation of gene ontology categories in biological networks. *Bioinformatics* 21, 3448–3449.
- Smith, P.J., Wise, L.S., Berkowitz, R., Wan, C., Rubin, C.S., 1988. Insulin-like growth factor-I is an essential regulator of the differentiation of 3T3-L1 adipocytes. *J. Biol. Chem.* 263, 9402–9408.
- Smyth, G.K., 2005. limma: Linear Models for Microarray Data, in: ... And Computational Biology Solutions Using R and ..., *Statistics for Biology and Health*. Springer-Verlag, New York, pp. 397–420.
- Solberg, L.C., Valdar, W., Gauguier, D., Nunez, G., Taylor, A., Burnett, S., Arboledas-Hita, C., Hernandez-Pliego, P., Davidson, S., Burns, P., Bhattacharya, S., Hough, T., Higgs, D., Klenerman, P., Cookson, W.O., Zhang, Y., Deacon, R.M., Rawlins, J.N.P., Mott, R., Flint, J., 2006. A protocol for high-throughput phenotyping, suitable for quantitative trait



analysis in mice. *Mamm. Genome* 17, 129–146.

Toye, A.A., Dumas, M.E., Blancher, C., Rothwell, A.R., Fearnside, J.F., Wilder, S.P., Bihoreau, M.T., Cloarec, O., Azzouzi, I., Young, S., Barton, R.H., Holmes, E., McCarthy, M.I., Tatoud, R., Nicholson, J.K., Scott, J., Gauguier, D., 2007. Subtle metabolic and liver gene transcriptional changes underlie diet-induced fatty liver susceptibility in insulin-resistant mice. *Diabetologia* 50, 1867–1879.

Valdar, W., Solberg, L.C., Gauguier, D., Cookson, W.O., Rawlins, J.N.P., Mott, R., Flint, J., 2006. Genetic and environmental effects on complex traits in mice. *Genetics* 174, 959–984.

Veselkov, K.A., Lindon, J.C., Ebbels, T.M.D., Crockford, D., Volynkin, V.V., Holmes, E., Davies, D.B., Nicholson, J.K., 2009. Recursive segment-wise peak alignment of biological (1)h NMR spectra for improved metabolic biomarker recovery. *Anal Chem* 81, 56–66.

Veselkov, K.A., Vingara, L.K., Masson, P., Robinette, S.L., Want, E., Li, J.V., Barton, R.H., Boursier-Neyret, C., Walther, B., Ebbels, T.M., Pelczer, I., Holmes, E., Lindon, J.C., Nicholson, J.K., 2011. Optimized preprocessing of ultra-performance liquid chromatography/mass spectrometry urinary metabolic profiles for improved information recovery. *Anal Chem* 83, 5864–5872.

Wang, F.-M., Chen, Y.-J., Ouyang, H.-J., 2011. Regulation of unfolded protein response modulator XBP1s by acetylation and deacetylation. *Biochem. J.* 433, 245–252.

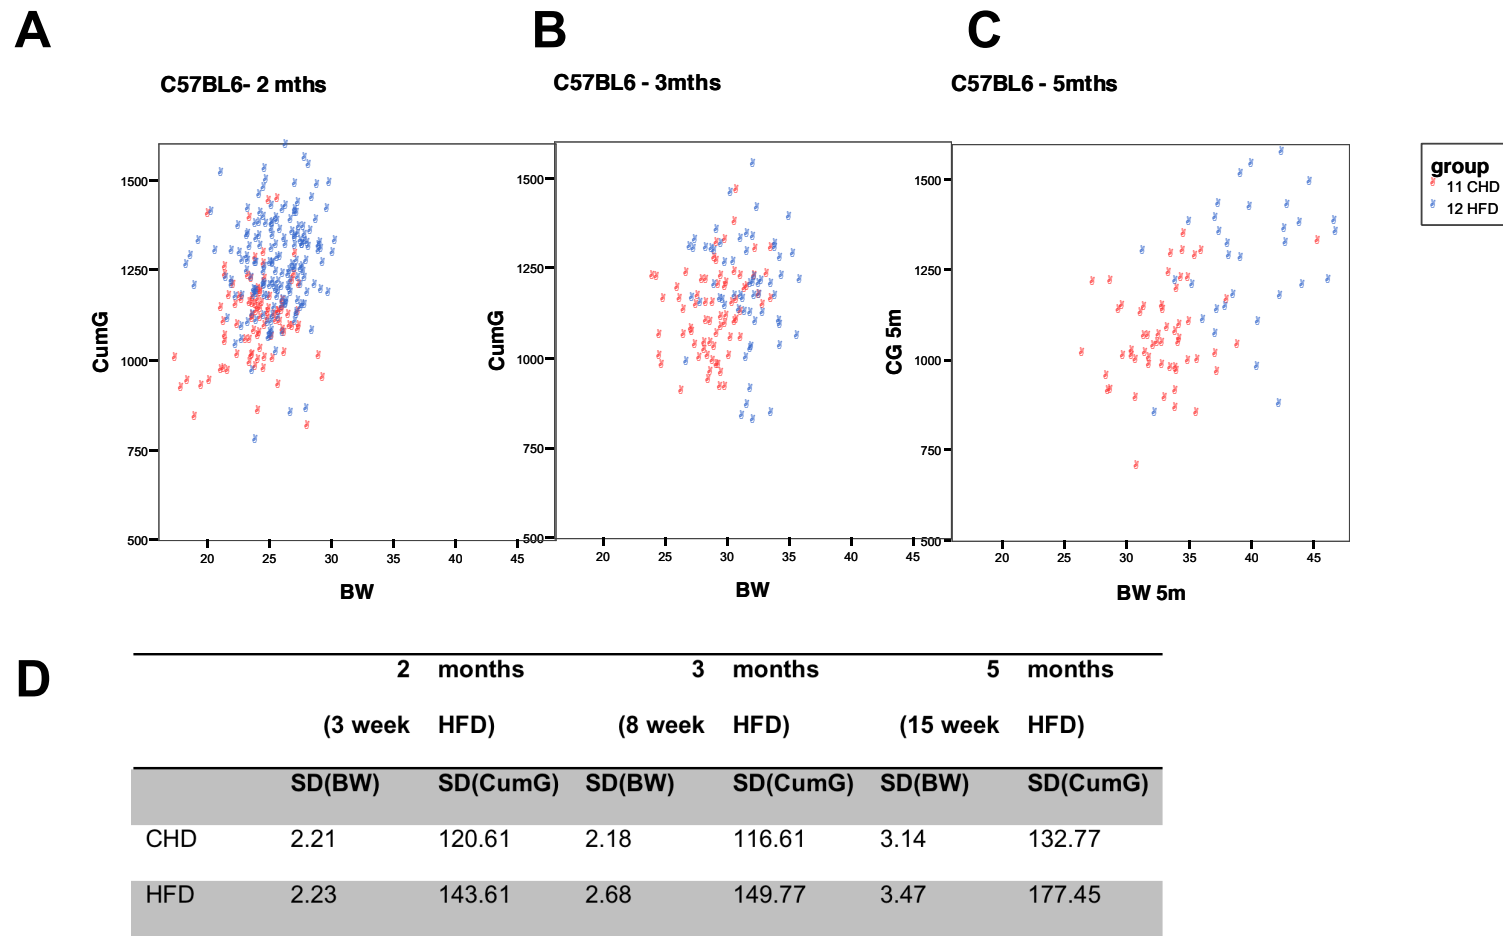

**Figure S1. Preliminary assessment of phenotypic variability in C57BL/6J mice.** Two populations of isogenic C57BL/6J fed either CHD (n=145) or HFD (n=193).

**A** Biplot showing rapid segregation of physiological phenotypes for diabetes (cumulative glycemia, CumG) and obesity (BW) after 3, 7 and 15 weeks.

**B** Standard deviations associated with the BW vs. CumG scatter plots during the onset of diabetes and obesity.

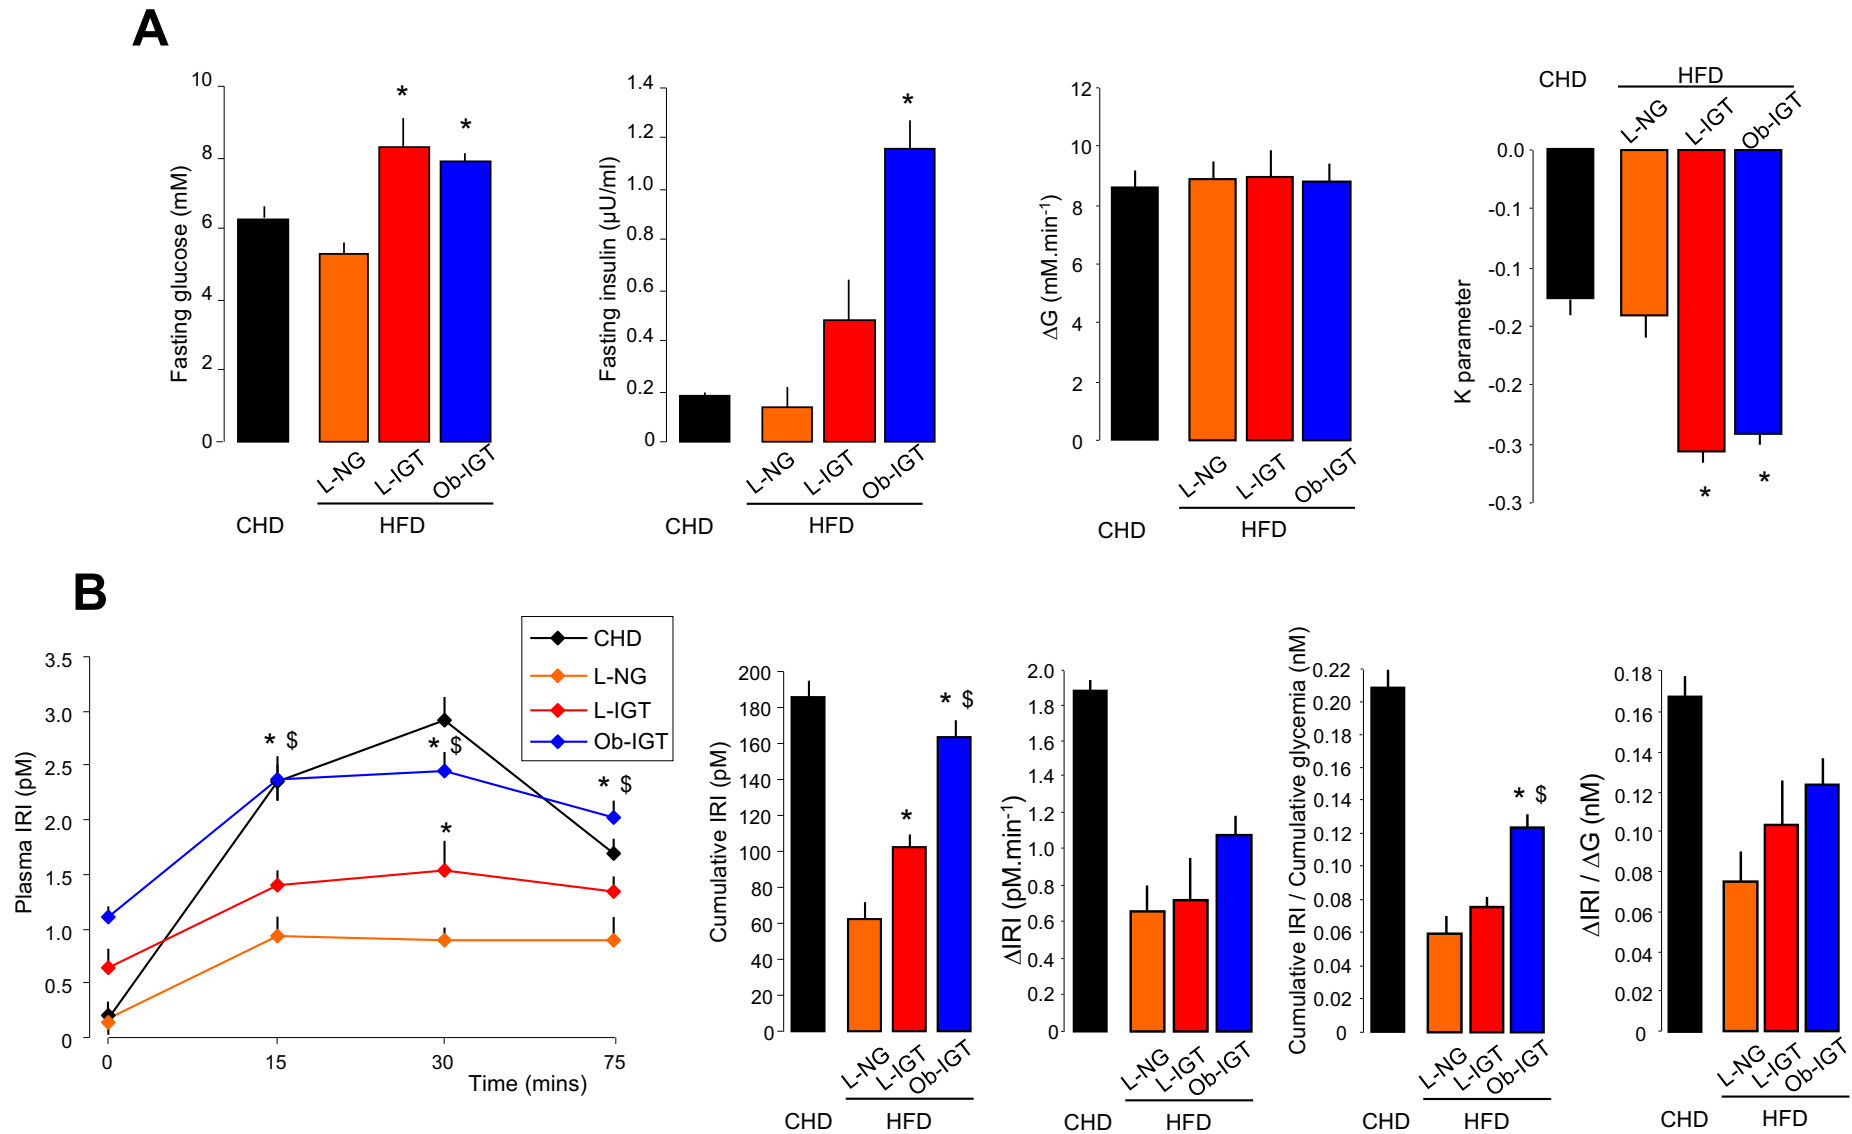

**Figure S2. Phenotypic features associated with impaired glucose tolerance and insulin secretion in extreme responders to high fat diet feeding, related to Fig. 1.**

**S2A** Effects of short-term (3 weeks) high fat diet feeding on glucose homeostasis in C57BL/6J mice.

**S2B** Glucose-stimulated insulin secretion. Age matched controls were fed a standard carbohydrate diet (CHD) (n=50). Three fat-fed groups (n=6) were classified as lean normoglycemic (LNG), lean glucose intolerant (L-IGT), or obese glucose intolerant (Ob-IGT). Data are presented as means ± SE \*p<0.05, \*\*p<0.01, \*\*\*p<0.001.

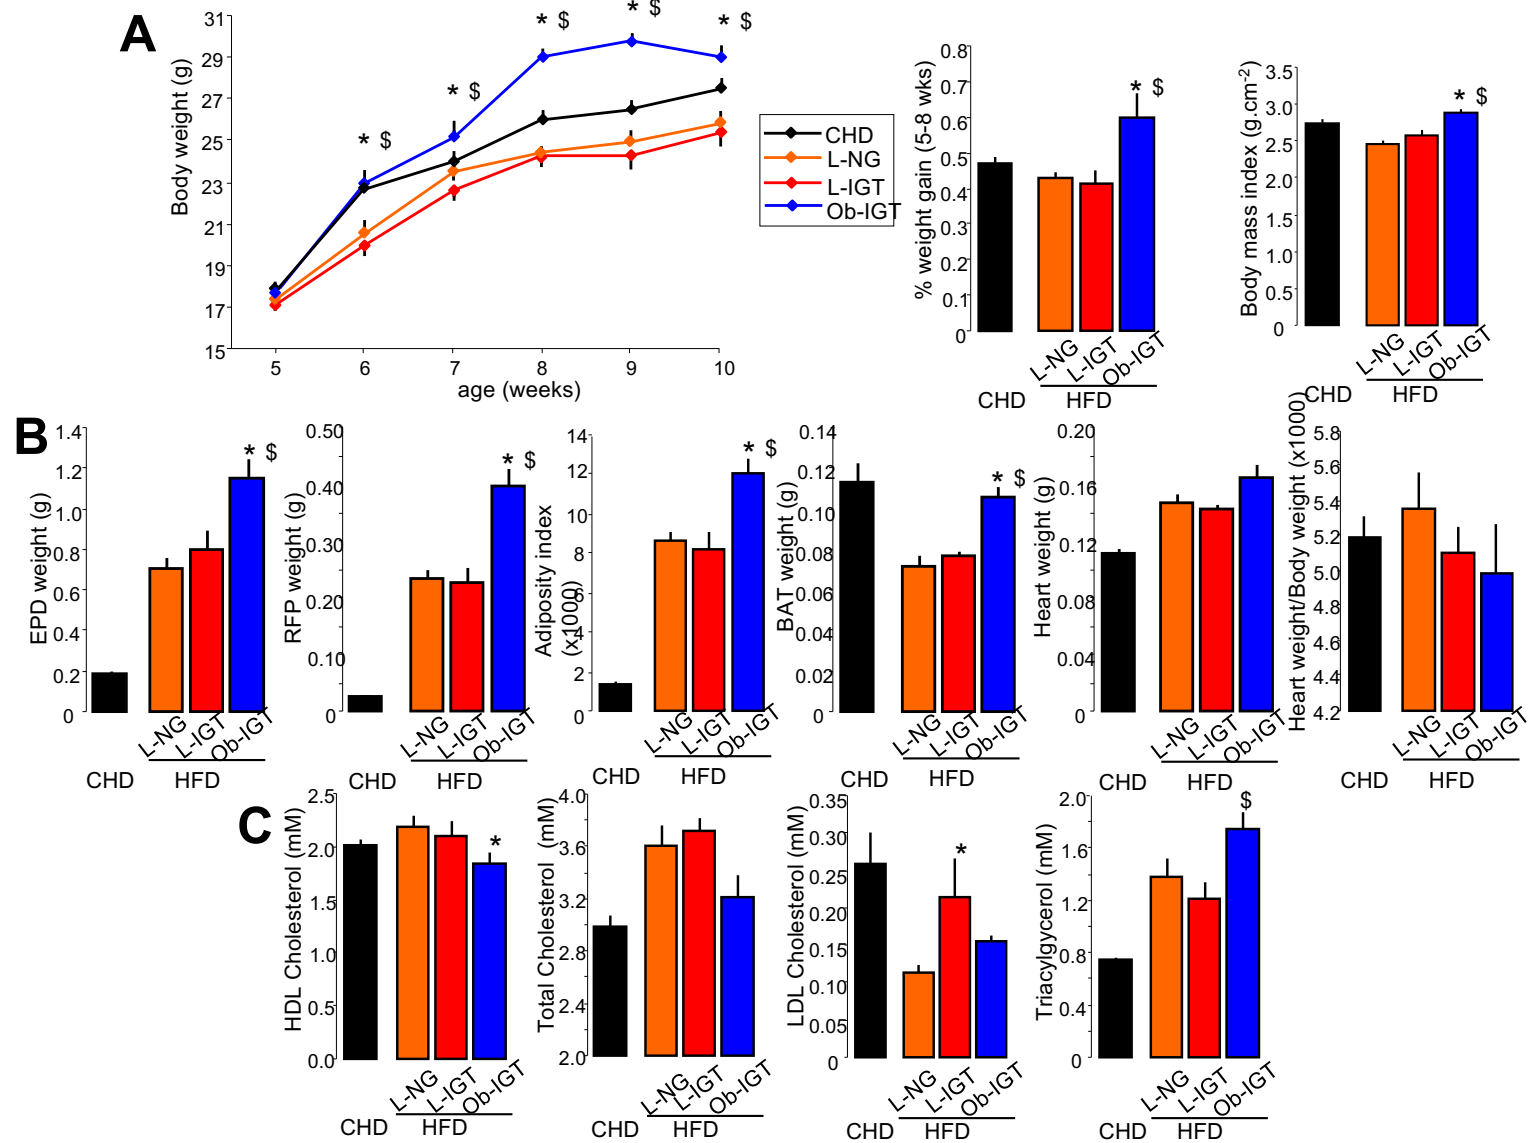

**Figure S3. Phenotypic features associated with body weight, organ weight and lipid metabolism in extreme responders to high fat diet feeding, related to Fig. 1.**

**S3A** Effects of high fat diet feeding on the evolution of BW

**S3B** Effects of high fat diet feeding on the evolution of organ weight and adiposity indices

**S3C** Effects of high fat diet feeding on the evolution of cholesterol metabolism in C57BL/6J mice.

Age matched controls were fed a standard carbohydrate diet (CHD, n=50). Three fat-fed groups (n=6) were classified as lean normoglycemic (LNG), lean glucose intolerant (L-IGT), or obese glucose intolerant (Ob-IGT). Data are presented as means±SE \*p<0.05, \*\*p<0.01, \*\*\*p<0.001.

**A****Elevated Plus Maze**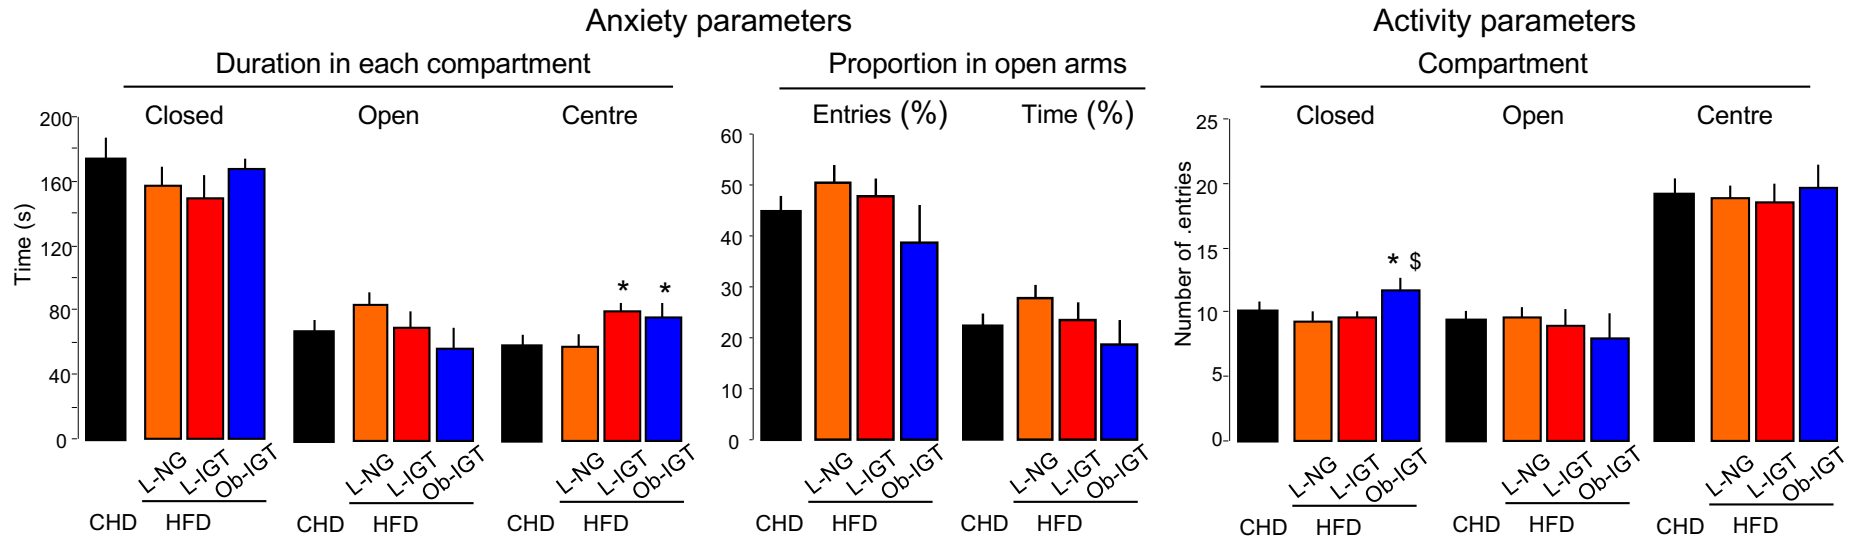**B****Open Field**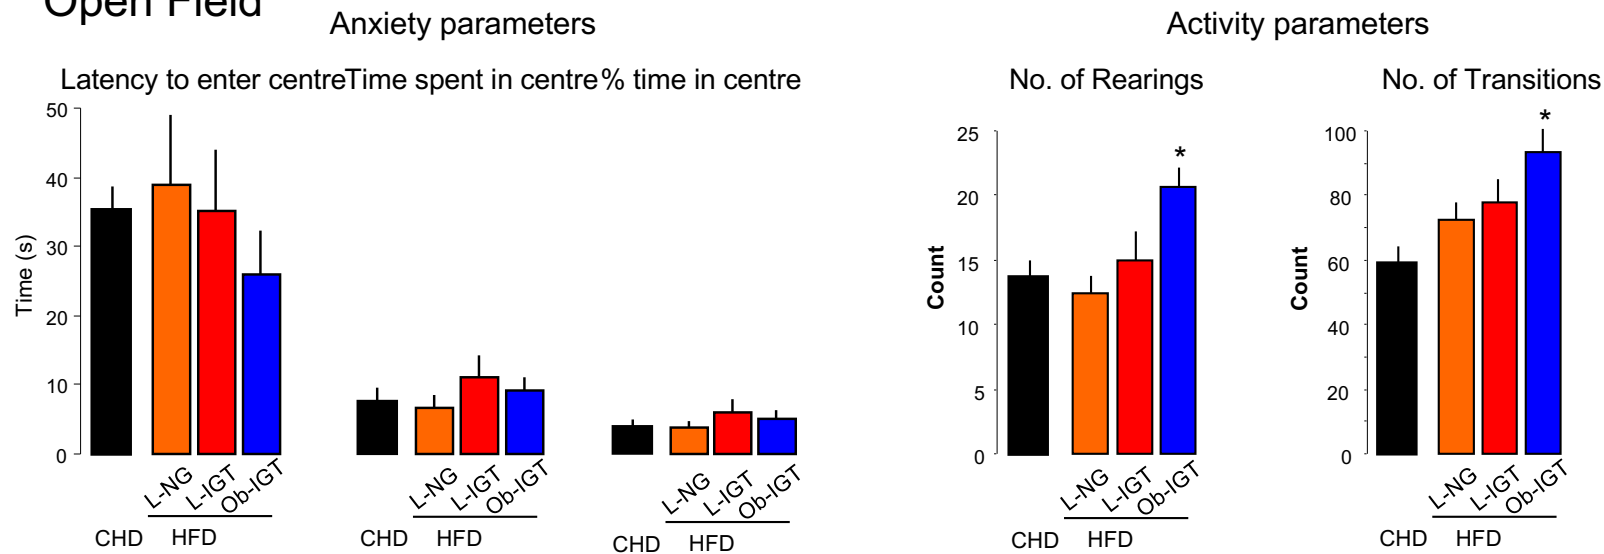

**Figure S4. Phenotypic features associated with anxiety and activity in extreme responders to high fat diet feeding, related to Fig. 1.**

**S4A** Elevated plus maze (EPM) activity and anxiety test.

**S4B** Open Field (OF) activity and anxiety test.

Effects of short-term (3 weeks) high fat diet feeding on anxiety and activity phenotypes determined through elevated plus maze and OF procedures in C57BL6 mice.
